# Supplementary material for: Molecular fingerprints and health risks of smoke from home-use incense burning
Source: Copernicus journal article supplement (doi:10.5194/acp-23-13585-2023), 2023-11-01
Supplement: Supplementary file 1 [file acp-23-13585-2023-supplement.pdf]

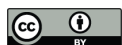

*Supplement of*

## **Molecular fingerprints and health risks of smoke from home-use incense burning**

**Kai Song et al.**

*Correspondence to:* Rongzhi Tang (rongtang@cityu.edu.hk) and Song Guo (songguo@pku.edu.cn)

The copyright of individual parts of the supplement might differ from the article licence.

## 1 **Texts**

### 2 **Text S1. Arctic contamination potential (ACP) assessment.**

3 The partition coefficients of chemical compounds fall in the range of ( $-0.5 < \log K_{a-w} < 4$  &  $\log$   
4  $K_{o-a} < 9$ ) or ( $-3 < \log K_{a-w}$  &  $6.5 < \log K_{o-a} < 10$ ) are regarded as of high arctic contamination potential  
5 (ACP) concern (Zushi et al., 2019). Chemicals with high ACP are listed in Figure S15. Acetic acid, 1-  
6 hydroxy-2-propanone, 3-penten-2-one, 1-methyl-1H-pyrazole, benzenes (toluene, ethylbenzene, and  
7 xylenes), 2-furanmethanol, linalool, limonene, benzoic acid 2-ethylhexyl ester, and C15 – C21 *n* and  
8 *b*-alkanes are high ACP compounds (Figure S15).

9

10 **Tables**

11 **Table S1.** Detailed instrumentation parameters of TD-GC×GC-qMS.

12 **Table S2.** Calibration curves of the external standards.

13 **Table S3.** Chemicals quantified, with volatility and polarity bins, MIR, *k*OH, and SOA yields.

14 **Table S4.** Emission factors ( $\mu\text{g g}^{-1}$ ) of selected compounds in this study and comparison with other  
15 incense burning studies.

16

17 **Table S1.** Detailed instrumentation parameters of TD-GC×GC-qMS.

| <b>TDS</b>          |                                                                                                                               | <b>CIS</b>          |                              |
|---------------------|-------------------------------------------------------------------------------------------------------------------------------|---------------------|------------------------------|
| Carrier gas         | He, 50 mL/min                                                                                                                 | Initial temperature | 20 °C                        |
| Split/splitless     | splitless                                                                                                                     | Split/splitless     | Split, ratio = 15            |
| Temperature program | 30°C_60°C/min_280°C<br>(10 min)                                                                                               | Temperature program | 20°C_12°C/s_320°C<br>(5 min) |
| <b>GC×GC</b>        |                                                                                                                               | <b>qMS</b>          |                              |
| Carrier gas         | He, 1.0 mL/min                                                                                                                | Ion source          | EI (70 eV, 230 °C)           |
| Columns             | <b>1<sup>st</sup></b> Shimadzu SH-Rxi-1ms (30 m × 0.25 mm × 0.25 μm)<br><b>2<sup>nd</sup></b> BPX50 (2.5 m × 0.1 mm × 0.1 μm) | Mode                | TIC                          |
| Temperature program | 50 °C(5min)_3 °C/min_250 °C(5min)_10 °C/min_300 °C(20 min)                                                                    | Mass range          | 33-500 amu                   |

18

19 **Table S2.** Calibration curves of the external standards.

| compound                                  | class_detail | retention1 | retention2 | response        | slope      | intercept  | r_square | slope_lowest | response_lowest |
|-------------------------------------------|--------------|------------|------------|-----------------|------------|------------|----------|--------------|-----------------|
| Benzonitrile                              | nitriles     | 14.8       | 1.62       | Quantifier(103) | 248994.996 | -1030650.5 | 0.997891 | 6.37507E-06  | quantifier      |
| Styrene                                   | aromatics    | 12.2       | 0.93       | Quantifier(104) | 120819.674 | -94133.385 | 0.99244  | 1.10779E-05  | quantifier      |
| Acetic acid, 2-phenylethyl ester          | esters       | 23.4       | 1.29       | Quantifier(104) | 321753.949 | 80735.9534 | 0.997878 | 3.17118E-06  | quantifier      |
| Benzene, (1-methylethyl)-                 | aromatics    | 13.4       | 0.78       | Quantifier(105) | 229105.896 | -749484.52 | 0.988508 | 7.14837E-06  | quantifier      |
| Benzyl Benzoate                           | esters       | 35.6       | 1.89       | Quantifier(105) | 360507.357 | -902951.99 | 0.998724 | 4.19147E-06  | quantifier      |
| Acetophenone                              | ketones      | 17.7       | 1.5        | Quantifier(105) | 286297.664 | -155506.46 | 0.984967 | 3.89734E-06  | quantifier      |
| Acetic acid, phenylmethyl ester           | esters       | 20.7       | 1.32       | Quantifier(108) | 223813.137 | -756200.65 | 0.989638 | 7.52782E-06  | quantifier      |
| Phenol, 3-methyl-                         | phenols      | 18.3       | 1.2        | Quantifier(108) | 358479.616 | 896822.628 | 0.994235 | 2.15997E-06  | quantifier      |
| Phenol, 2-methyl-                         | phenols      | 19.8       | 0.96       | Quantifier(108) | 228150.221 | -3560249   | 0.978509 | 1.12132E-05  | quantifier      |
| Ethane, hexachloro-                       | halocarbons  | 18.4       | 0.93       | Quantifier(117) | 34274.7698 | 205153.834 | 0.97634  | 2.00249E-05  | quantifier      |
| Indole                                    | indoles      | 24.4       | 2.1        | Quantifier(117) | 362498.345 | -1648500.4 | 0.997581 | 5.0784E-06   | quantifier      |
| p-Chloroaniline                           | others       | 21.9       | 1.8        | Quantifier(127) | 143633.14  | -473328.4  | 0.998068 | 9.19422E-06  | quantifier      |
| Naphthalene                               | PAHs         | 21.6       | 1.44       | Quantifier(128) | 299143.85  | 7078753.5  | 0.988491 | 1.57341E-06  | quantifier      |
| Phenol, 2-chloro-                         | phenols      | 15.6       | 1.14       | Quantifier(128) | 95238.115  | -486162.9  | 0.994018 | 1.61046E-05  | quantifier      |
| Phenol, 4-chloro-                         | phenols      | 22.2       | 1.32       | Quantifier(128) | 238199.115 | -818513.4  | 0.998537 | 4.80132E-06  | quantifier      |
| Hexanedioic acid, bis(2-ethylhexyl) ester | esters       | 47.2       | 1.2        | Quantifier(129) | 193866.316 | -1630739.1 | 0.979979 | 1.98014E-05  | quantifier      |
| Quinoline                                 | others       | 23         | 1.8        | Quantifier(129) | 419799.88  | -1522343.3 | 0.997264 | 3.72402E-06  | quantifier      |
| Benzeneethanol, dimethyl-, acetate        | esters       | 25.3       | 1.02       | Quantifier(132) | 124525.261 | -323795.24 | 0.999203 | 1.23189E-05  | quantifier      |
| Benzothiazole                             | thiazoles    | 22.4       | 2.04       | Quantifier(135) | 451895.164 | 53866567   | 0.868748 | 3.39858E-07  | quantifier      |
| Phenol, 2-nitro-                          | phenols      | 19.8       | 1.44       | Quantifier(139) | 46861.0462 | -432734.46 | 0.99981  | 3.79603E-05  | quantifier      |
| Naphthalene, 2-methyl-                    | PAHs         | 24.8       | 1.35       | Quantifier(142) | 236865.4   | 5523543    | 0.987994 | 2.15125E-06  | quantifier      |
| 1-Naphthalenol                            | phenols      | 30.1       | 1.98       | Quantifier(144) | 161299.719 | -1716279.6 | 0.994577 | 1.03691E-05  | quantifier      |
| 2-Naphthalenol                            | phenols      | 30.3       | 2.04       | Quantifier(144) | 363638.135 | -2671808.5 | 0.992284 | 3.46363E-06  | quantifier      |

|                                                            |                 |      |      |                 |            |            |          |             |            |
|------------------------------------------------------------|-----------------|------|------|-----------------|------------|------------|----------|-------------|------------|
| Benzene, 1,3-dichloro-                                     | halocarbons     | 15.9 | 1.05 | Quantifier(146) | 72130.403  | 497848.447 | 0.969565 | 8.0583E-06  | quantifier |
| Benzene, 1,4-dichloro-                                     | halocarbons     | 16.1 | 1.08 | Quantifier(146) | 128297.283 | 144536.547 | 0.976931 | 5.7832E-06  | quantifier |
| Benzene, 1,2-dichloro-                                     | halocarbons     | 16.9 | 1.14 | Quantifier(146) | 112626.282 | 294316.377 | 0.988771 | 6.43652E-06 | quantifier |
| Pyridine, 3,5-dichloro-                                    | Pyridines       | 15.9 | 1.08 | Quantifier(147) | 146161.53  | -456122.52 | 0.997571 | 9.8031E-06  | quantifier |
| Diethyl Phthalate                                          | esters          | 31.7 | 1.65 | Quantifier(149) | 134313.619 | 375738.923 | 0.98491  | 5.69326E-06 | quantifier |
| 1,2-Benzenedicarboxylic acid,<br>bis(2-methylpropyl) ester | esters          | 37.5 | 1.38 | Quantifier(149) | 307433.707 | 8253485.18 | 0.991862 | 1.44136E-06 | quantifier |
| Dibutyl phthalate                                          | esters          | 39.3 | 1.47 | Quantifier(149) | 237452.714 | 5072697.77 | 0.999901 | 2.04197E-06 | quantifier |
| Benzyl butyl phthalate                                     | esters          | 45.9 | 2.58 | Quantifier(149) | 140822.204 | -124237.75 | 0.994786 | 7.73961E-06 | quantifier |
| Bis(2-ethylhexyl) phthalate                                | esters          | 50.2 | 2.22 | Quantifier(149) | 219340.444 | -131055.27 | 0.995097 | 4.66365E-06 | quantifier |
| Di-N-octyl phthalate                                       | esters          | 53.6 | 1.56 | Quantifier(149) | 339861.949 | -1224278.1 | 0.994692 | 3.50596E-06 | quantifier |
| Acenaphthylene                                             | PAHs            | 28.6 | 1.83 | Quantifier(152) | 303847.136 | 5053784    | 0.983424 | 1.957E-06   | quantifier |
| Acenaphthene                                               | PAHs            | 29.5 | 1.74 | Quantifier(153) | 121532.983 | 4365923.15 | 0.994059 | 2.99039E-06 | quantifier |
| Biphenyl                                                   | PAHs            | 26.9 | 1.47 | Quantifier(154) | 296508.489 | 1457408.82 | 0.984094 | 2.39984E-06 | quantifier |
| Naphthalene, 2-chloro-                                     | halocarbons     | 26.8 | 1.53 | Quantifier(162) | 154533.698 | 3918104.46 | 0.990002 | 2.92849E-06 | quantifier |
| Phenol, 2,4-dichloro-                                      | phenols         | 21.3 | 1.2  | Quantifier(162) | 179169.06  | -1379638.5 | 0.988449 | 6.5718E-06  | quantifier |
| Dimethyl phthalate                                         | esters          | 28.4 | 1.86 | Quantifier(163) | 183210.783 | 704428.175 | 0.984511 | 4.41416E-06 | quantifier |
| Benzene, 2-methyl-1,3-dinitro-                             | nitro-aromatics | 28.1 | 2.25 | Quantifier(165) | 40692.07   | 107516.55  | 0.991284 | 2.44959E-05 | quantifier |
| Fluorene                                                   | PAHs            | 31.9 | 1.74 | Quantifier(165) | 185048.557 | 1232454.62 | 0.977325 | 3.18421E-06 | quantifier |
| Carbazole                                                  | others          | 37.1 | 2.64 | Quantifier(167) | 330671.238 | 509329.12  | 0.994968 | 2.35223E-06 | quantifier |
| Dibenzofuran                                               | ethers          | 30.3 | 1.68 | Quantifier(168) | 279938.104 | 4594967.5  | 0.991009 | 2.08813E-06 | quantifier |
| Diphenyl ether                                             | ethers          | 27.4 | 1.5  | Quantifier(170) | 200982.002 | 404653.953 | 0.993451 | 4.34928E-06 | quantifier |
| Phenanthrene                                               | PAHs            | 36.1 | 2.16 | Quantifier(178) | 186447.071 | 5917632.92 | 0.996963 | 2.09913E-06 | quantifier |
| Anthracene                                                 | PAHs            | 36.3 | 2.13 | Quantifier(178) | 307956.618 | 3390378.24 | 0.954747 | 1.89444E-06 | quantifier |
| Benzene, 1-chloro-2-<br>(trifluoromethyl)-                 | halocarbons     | 10.9 | 0.63 | Quantifier(180) | 52767.7899 | -288050.76 | 0.980687 | 3.37298E-05 | quantifier |
| Benzene, 1,2,4-trichloro-                                  | halocarbons     | 21.4 | 1.14 | Quantifier(180) | 85996.094  | 616790.412 | 0.982474 | 7.2993E-06  | quantifier |
| Dibutyl adipate                                            | esters          | 35.6 | 0.99 | Quantifier(185) | 59991.765  | 894675.35  | 0.981535 | 1.10492E-05 | quantifier |

|                                         |             |      |      |                 |            |            |          |             |            |
|-----------------------------------------|-------------|------|------|-----------------|------------|------------|----------|-------------|------------|
| Phenol, 2,4,6-trichloro-                | phenols     | 26.3 | 1.32 | Quantifier(196) | 42228.88   | 137118.2   | 0.996066 | 2.26656E-05 | quantifier |
| Phenol, 2,4,5-trichloro-                | phenols     | 26.7 | 1.29 | Quantifier(196) | 41491.7831 | -28905.413 | 0.997369 | 2.55656E-05 | quantifier |
| Fluoranthene                            | PAHs        | 41.5 | 2.46 | Quantifier(202) | 278226.797 | -134067.87 | 0.999049 | 2.26623E-06 | quantifier |
| Pyrene                                  | PAHs        | 42.4 | 2.7  | Quantifier(202) | 300945.846 | 1604594.34 | 0.984916 | 2.07521E-06 | quantifier |
| Benzene, 1-chloro-4-phenoxy-            | aromatics   | 32   | 1.56 | Quantifier(204) | 79511.208  | 560171.89  | 0.976335 | 7.20455E-06 | quantifier |
| Cyclotrisiloxane, hexamethyl-(D3)       | siloxanes   | 10.3 | 6.21 | Quantifier(207) | 21169.1058 | -681506.5  | 0.953529 |             |            |
| 1,3-Butadiene, 1,1,2,3,4,4-hexachloro-  | halocarbons | 22.8 | 0.84 | Quantifier(225) | 21615.92   | 701041.8   | 0.997131 | 1.79058E-05 | quantifier |
| Benz[a]anthracene                       | PAHs        | 48.4 | 4.5  | Quantifier(228) | 213630.011 | 594086.284 | 0.987413 | 3.84991E-06 | quantifier |
| Chrysene                                | PAHs        | 48.6 | 4.77 | Quantifier(228) | 297532.503 | 1064500.33 | 0.991383 | 2.28984E-06 | quantifier |
| Benzene, 1-bromo-4-phenoxy-             | halocarbons | 34.1 | 1.74 | Quantifier(248) | 33682.9865 | 722737.231 | 0.993747 | 1.46462E-05 | quantifier |
| Benzo[b]fluoranthene                    | PAHs        | 54.3 | 4.08 | Quantifier(252) | 568086.558 | 1558460.16 | 0.971726 | 1.46715E-06 | quantifier |
| Benzo[k]fluoranthene                    | PAHs        | 55.9 | 5.34 | Quantifier(252) | 207862.341 | 79057.7675 | 0.993479 | 4.56523E-06 | quantifier |
| Benzo[ghi]perylene                      | PAHs        | 62.9 | 4.53 | Quantifier(276) | 239833.004 | 749842.5   | 0.985134 | 4.11007E-06 | quantifier |
| Indeno[1,2,3-cd]pyrene                  | PAHs        | 64.8 | 6.6  | Quantifier(276) | 124920.805 | 11890.7    | 0.984077 | 8.7779E-06  | quantifier |
| Cyclotetrasiloxane, octamethyl-(D4)     | siloxanes   | 16.5 | 6.21 | Quantifier(281) | 128593.469 | 1902775.86 | 0.967596 | 4.48484E-06 | quantifier |
| Benzene, hexachloro-                    | halocarbons | 34.8 | 1.41 | Quantifier(284) | 28244.7135 | 734622.769 | 0.986717 | 1.58519E-05 | quantifier |
| n-Propyl acetate                        | esters      | 6.9  | 0.6  | Quantifier(43)  | 62835.5046 | 712890.06  | 0.958948 | 8.26336E-06 | quantifier |
| sec-Butyl acetate                       | esters      | 7.9  | 6.57 | Quantifier(43)  | 56155.4618 | 232064.088 | 0.995145 | 1.27468E-05 | quantifier |
| 1-Butanol, 3-methyl-, acetate           | esters      | 11.7 | 0.66 | Quantifier(43)  | 174466.653 | -754964.51 | 0.987068 | 8.35382E-06 | quantifier |
| Acetic acid, hexyl ester                | esters      | 16.3 | 0.69 | Quantifier(43)  | 137317.113 | 390939.782 | 0.995137 | 5.3658E-06  | quantifier |
| 2-Heptanone                             | ketones     | 12   | 0.78 | Quantifier(43)  | 235077.675 | -16249.99  | 0.999539 | 3.8733E-06  | quantifier |
| 5-Hepten-2-one, 6-methyl-               | ketones     | 15.3 | 0.87 | Quantifier(43)  | 135602.853 | -91064.874 | 0.994135 | 7.84336E-06 | quantifier |
| Methyl thiolacetate                     | others      | 6.5  | 0.75 | Quantifier(43)  | 36839.1518 | 124770.425 | 0.997808 | 2.10015E-05 | quantifier |
| Propanoic acid, 2-hydroxy-, ethyl ester | esters      | 9.6  | 0.78 | Quantifier(45)  | 229477.995 | -2133724.3 | 0.991894 | 1.08789E-05 | quantifier |

|                                   |           |      |      |                |            |            |          |             |            |
|-----------------------------------|-----------|------|------|----------------|------------|------------|----------|-------------|------------|
| Bis(2-chloro-1-methylethyl) ether | ethers    | 17.4 | 0.93 | Quantifier(45) | 249499.551 | 2091527.72 | 0.972361 | 2.43046E-06 | quantifier |
| S-Methyl methanethiosulphonate    | others    | 17   | 2.73 | Quantifier(47) | 55663.3    | -1299977   | 1        |             |            |
| 2-Propenenitrile, 2-chloro-       | nitriles  | 5.2  | 0.57 | Quantifier(52) | 39085.6513 | 62634.1402 | 0.998079 | 2.22115E-05 | quantifier |
| 1-Butanol, 3-methyl-              | alcohols  | 7.4  | 6.57 | Quantifier(55) | 110459.135 | -466671.3  | 0.996545 | 1.73678E-05 | quantifier |
| 1-Dodecanol                       | alcohols  | 29.5 | 0.69 | Quantifier(55) | 123824.649 | -924855.59 | 0.985058 | 3.75208E-05 | quantifier |
| Cyclohexanone                     | ketones   | 11.8 | 1.35 | Quantifier(55) | 191984.33  | -604929.55 | 0.994404 | 8.8754E-06  | quantifier |
| Caprolactam                       | others    | 22.9 | 2.52 | Quantifier(55) | 115640.482 | -1212316.5 | 0.999999 |             |            |
| 1-Butanol                         | alcohols  | 6    | 0.51 | Quantifier(56) | 96642.0912 | -31504.808 | 0.996538 | 1.12188E-05 | quantifier |
| 1-Hexanol                         | alcohols  | 11.5 | 0.69 | Quantifier(56) | 126154.929 | -1123407   | 0.98363  |             |            |
| Decanal                           | aldehydes | 22.2 | 0.72 | Quantifier(57) | 10032.0096 | 2353536.5  | 0.999969 | 1.00115E-05 | quantifier |
| Dodecanal                         | aldehydes | 27.7 | 0.72 | Quantifier(57) | 53663.0143 | 293039.342 | 0.975566 | 1.3212E-05  | quantifier |
| n-Butyl ether                     | ethers    | 12.2 | 0.48 | Quantifier(57) | 274589.281 | -1295799.9 | 0.994309 | 9.45026E-06 | quantifier |
| 3-Heptanone                       | ketones   | 11.9 | 0.75 | Quantifier(57) | 175663.864 | 156580.395 | 0.987488 | 5.04713E-06 | quantifier |
| C7                                | n-alkanes | 6.8  | 0.3  | Quantifier(57) | 7320.28    | 432670.95  | 0.95042  | 3.86884E-05 | quantifier |
| C8                                | n-alkanes | 9.5  | 6.36 | Quantifier(57) | 8475.435   | 333423.15  | 0.978284 | 4.0298E-05  | quantifier |
| C9                                | n-alkanes | 12.9 | 6.36 | Quantifier(57) | 120235.624 | -99427.234 | 0.9647   | 1.61956E-05 | quantifier |
| C10                               | n-alkanes | 16.3 | 6.39 | Quantifier(57) | 83877.9904 | 4201287.31 | 0.997749 | 3.42886E-06 | quantifier |
| C11                               | n-alkanes | 19.6 | 0.39 | Quantifier(57) | 58379.5981 | 4919162.77 | 0.991546 | 3.38982E-06 | quantifier |
| C12                               | n-alkanes | 22.6 | 0.39 | Quantifier(57) | 81584.735  | 4801650.65 | 0.991965 | 3.13495E-06 | quantifier |
| C13                               | n-alkanes | 25.3 | 0.42 | Quantifier(57) | 97441.9846 | 5681795.69 | 0.996596 | 2.59862E-06 | quantifier |
| C14                               | n-alkanes | 27.9 | 0.42 | Quantifier(57) | 61722.64   | 7616313.35 | 0.98976  | 2.29698E-06 | quantifier |
| C15                               | n-alkanes | 30.4 | 0.45 | Quantifier(57) | 59203.39   | 6216782.1  | 0.966441 | 2.84017E-06 | quantifier |
| C16                               | n-alkanes | 32.6 | 6.45 | Quantifier(57) | 46754.24   | 5451474.35 | 0.978873 | 3.1732E-06  | quantifier |
| C17                               | n-alkanes | 34.8 | 6.45 | Quantifier(57) | 83770.76   | 7352452.9  | 0.96089  | 2.35652E-06 | quantifier |
| C18                               | n-alkanes | 36.9 | 0.48 | Quantifier(57) | 48317      | 5389776    | 0.994807 | 3.12675E-06 | quantifier |
| C19                               | n-alkanes | 38.8 | 6.51 | Quantifier(57) | 64620.305  | 5266453.45 | 0.988654 | 3.1737E-06  | quantifier |



|                                                  |           |      |      |                |            |            |          |             |            |
|--------------------------------------------------|-----------|------|------|----------------|------------|------------|----------|-------------|------------|
| C20                                              | n-alkanes | 40.8 | 0.51 | Quantifier(57) | 119998.177 | 5134521.54 | 0.99989  | 2.6596E-06  | quantifier |
| C21                                              | n-alkanes | 42.5 | 0.54 | Quantifier(57) | 130128.327 | 4467730.54 | 0.997373 | 2.85993E-06 | quantifier |
| C22                                              | n-alkanes | 44.2 | 0.54 | Quantifier(57) | 139113.687 | 4675122.23 | 0.989379 | 2.74312E-06 | quantifier |
| C23                                              | n-alkanes | 45.9 | 0.63 | Quantifier(57) | 87427.67   | 6186200.05 | 0.97346  | 2.66406E-06 | quantifier |
| C24                                              | n-alkanes | 47.8 | 0.78 | Quantifier(57) | 159896.493 | 6077824    | 0.99682  | 2.10874E-06 | quantifier |
| C25                                              | n-alkanes | 50   | 0.99 | Quantifier(57) | 180486.007 | 5367065    | 0.993152 | 2.14525E-06 | quantifier |
| C26                                              | n-alkanes | 52.1 | 0.69 | Quantifier(57) | 102498.456 | 8012553.69 | 0.995087 | 2.03811E-06 | quantifier |
| C27                                              | n-alkanes | 53.7 | 0.69 | Quantifier(57) | 129061.414 | 4907054    | 0.997719 | 2.62096E-06 | quantifier |
| C28                                              | n-alkanes | 55.4 | 0.81 | Quantifier(57) | 207877.739 | 3395350.5  | 0.999502 | 2.68609E-06 | quantifier |
| C29                                              | n-alkanes | 57.2 | 0.99 | Quantifier(57) | 184951.404 | 2317084.5  | 0.999612 | 3.37157E-06 | quantifier |
| C30                                              | n-alkanes | 59.4 | 1.23 | Quantifier(57) | 179109.234 | 209777.88  | 0.982392 | 4.12872E-06 | quantifier |
| C31                                              | n-alkanes | 62   | 1.5  | Quantifier(57) | 153485.431 | 23965.0565 | 0.988572 | 5.23866E-06 | quantifier |
| C32                                              | n-alkanes | 65.1 | 1.83 | Quantifier(57) | 104885.436 | 1953288    | 0.973182 | 5.48111E-06 | quantifier |
| Terpineol                                        | alcohols  | 21.9 | 0.93 | Quantifier(59) | 110318.538 | 343731.031 | 0.977379 | 8.07002E-06 | quantifier |
| Propanoic acid, 2-chloro-,<br>methyl ester       | esters    | 8.7  | 0.9  | Quantifier(63) | 61333.2811 | -168558.26 | 0.994755 | 1.98275E-05 | quantifier |
| o-Nitroaniline                                   | others    | 27.2 | 2.37 | Quantifier(65) | 57086.215  | -15018.15  | 0.991773 | 2.06838E-05 | quantifier |
| m-Nitroaniline                                   | others    | 29.2 | 2.55 | Quantifier(65) | 54811.12   | -3796.95   | 0.991837 | 2.12108E-05 | quantifier |
| p-Nitroaniline                                   | others    | 32   | 3    | Quantifier(65) | 38502.19   | 240522.1   | 0.985155 | 2.38923E-05 | quantifier |
| Citronellol                                      | alcohols  | 22.9 | 0.78 | Quantifier(69) | 78849.9241 | -233192.06 | 0.991207 | 2.0028E-05  | quantifier |
| Citral                                           | aldehydes | 23.9 | 0.99 | Quantifier(69) | 93061.2394 | -430026.17 | 0.996819 | 1.96637E-05 | quantifier |
| Linalool                                         | alcohols  | 19.2 | 0.69 | Quantifier(71) | 13409.5976 | -29238.05  | 0.997827 |             |            |
| Butanoic acid, ethyl ester                       | esters    | 9.2  | 0.66 | Quantifier(71) | 32356.781  | 225214.346 | 0.995375 | 1.74158E-05 | quantifier |
| 2,2,4-Trimethyl-1,3-pentanediol<br>diisobutyrate | esters    | 26.9 | 0.81 | Quantifier(71) | 114293.663 | -75685.576 | 0.992158 | 1.16457E-05 | quantifier |
| Formamide, N,N-dimethyl-                         | amides    | 8.3  | 1.62 | Quantifier(73) | 136372.576 | -1639405.1 | 0.991024 | 6.46743E-05 | quantifier |
| Cyclopentasiloxane,<br>decamethyl-(D5)           | siloxanes | 21.5 | 6.24 | Quantifier(73) | 45705.4052 | 3844226.02 | 0.971154 | 4.45964E-06 | quantifier |

|                                      |                 |      |      |                |            |            |          |             |            |
|--------------------------------------|-----------------|------|------|----------------|------------|------------|----------|-------------|------------|
| Cyclohexasiloxane, dodecamethyl-(D6) | siloxanes       | 26.4 | 6.21 | Quantifier(73) | 27461.9983 | 2314406.33 | 0.92923  | 8.05801E-06 | quantifier |
| N-Nitrosodimethylamine               | amines          | 7.2  | 1.44 | Quantifier(74) | 79301.675  | 45695      | 0.999632 | 1.18737E-05 | quantifier |
| Benzaldehyde                         | aldehydes       | 14.2 | 1.47 | Quantifier(77) | 67111.0585 | 2527729.95 | 0.954625 | 6.08124E-06 | quantifier |
| Acetic acid, chloro-, ethyl ester    | esters          | 10.1 | 1.08 | Quantifier(77) | 58363.8652 | -273677.7  | 0.995285 | 2.99013E-05 | quantifier |
| Benzene, nitro-                      | nitro-aromatics | 18.2 | 1.65 | Quantifier(77) | 110574.044 | 88468.8707 | 0.988179 | 8.49194E-06 | quantifier |
| Azobenzene                           | others          | 32.7 | 1.68 | Quantifier(77) | 190853.681 | 1215199.02 | 0.981028 | 3.14077E-06 | quantifier |
| Benzyl alcohol                       | alcohols        | 17   | 1.38 | Quantifier(79) | 77124.835  | 943492.15  | 0.999689 | 8.13814E-06 | quantifier |
| Isophorone                           | ketones         | 19.4 | 1.2  | Quantifier(82) | 144711.039 | 5467039.79 | 0.998747 |             |            |
| Cyclohexane-C6                       | cycloalkanes    | 23.7 | 0.51 | Quantifier(83) | 93485.9397 | 4432996.97 | 0.998368 | 3.20437E-06 | quantifier |
| Cyclohexane-C7                       | cycloalkanes    | 26.5 | 0.51 | Quantifier(83) | 77441.18   | 4282127.45 | 0.964403 | 3.53225E-06 | quantifier |
| Cyclohexane-C8                       | cycloalkanes    | 29   | 6.54 | Quantifier(83) | 72784.8441 | 4100978.14 | 0.974758 | 3.84769E-06 | quantifier |
| Phenylethyl Alcohol                  | alcohols        | 19.4 | 1.41 | Quantifier(91) | 290662.176 | -2968011.1 | 0.99427  | 1.33354E-05 | quantifier |
| Toluene                              | aromatics       | 8.3  | 0.72 | Quantifier(91) | 40729.9019 | 1363235.23 | 0.990375 | 9.80998E-06 | quantifier |
| Ethylbenzene                         | aromatics       | 11.3 | 0.75 | Quantifier(91) | 77930.6472 | 570790.215 | 0.993751 | 8.01141E-06 | quantifier |
| Benzene, 1,3-dimethyl-               | aromatics       | 11.6 | 0.72 | Quantifier(91) | 272561.801 | -610546.59 | 0.990536 | 6.13796E-06 | quantifier |
| o-Xylene                             | aromatics       | 12.3 | 0.84 | Quantifier(91) | 155669.358 | -1368693.1 | 0.973105 | 1.68025E-05 | quantifier |
| Benzene, propyl-                     | aromatics       | 14.4 | 0.78 | Quantifier(91) | 277925.567 | 1056466.94 | 0.985482 | 3.43647E-06 | quantifier |
| Benzeneacetic acid, ethyl ester      | esters          | 23   | 1.29 | Quantifier(91) | 422328.049 | -462584.64 | 0.99985  | 2.6904E-06  | quantifier |
| Alpha-Pinene                         | alkenes         | 14   | 0.54 | Quantifier(93) | 7737.3504  | 60278.6087 | 0.97996  | 8.24436E-05 | quantifier |
| 3-Carene                             | alkenes         | 16.6 | 0.6  | Quantifier(93) | 127653.279 | -328175.98 | 0.986408 | 1.49216E-05 | quantifier |
| Linalyl acetate                      | esters          | 23.6 | 6.69 | Quantifier(93) | 55618.15   | -1844572   | 1        |             |            |
| Bis(2-chloroethyl) ether             | ethers          | 14.9 | 1.26 | Quantifier(93) | 124070.962 | 177735.477 | 0.987959 | 6.91045E-06 | quantifier |
| Methane, bis(2-chloroethoxy)-        | ethers          | 20.5 | 1.29 | Quantifier(93) | 112202.2   | 2775329.25 | 0.958071 | 4.62496E-06 | quantifier |
| Phenol                               | phenols         | 15.4 | 1.17 | Quantifier(94) | 75004.6846 | -828090.85 | 0.997412 | 3.70606E-05 | quantifier |
| Camphor                              | ketones         | 20.3 | 1.14 | Quantifier(95) | 103524.07  | -83537.949 | 0.995205 | 1.06481E-05 | quantifier |
| 1-Butanol                            | alcohols        | 6    | 0.51 | Volume(-)      | 371770.169 | 17028801   | 0.964114 | 4.4218E-07  | volume     |
| 1-Butanol, 3-methyl-                 | alcohols        | 7.4  | 6.57 | Volume(-)      | 768703.535 | 4686315.7  | 0.988049 | 8.6499E-07  | volume     |

|                              |              |      |      |           |            |            |          |             |        |
|------------------------------|--------------|------|------|-----------|------------|------------|----------|-------------|--------|
| 1-Hexanol                    | alcohols     | 11.5 | 0.69 | Volume(-) | 461868.264 | -1777981   | 0.984581 |             |        |
| Benzyl alcohol               | alcohols     | 17   | 1.38 | Volume(-) | 313467.05  | 24115041.3 | 0.996083 | 6.43458E-07 | volume |
| Linalool                     | alcohols     | 19.2 | 0.69 | Volume(-) | 106489.439 | 5653581.44 | 0.977716 |             |        |
| Phenylethyl Alcohol          | alcohols     | 19.4 | 1.41 | Volume(-) | 951424.093 | 3536114.26 | 0.997184 | 8.08847E-07 | volume |
| Terpineol                    | alcohols     | 21.9 | 0.93 | Volume(-) | 874457.355 | 8776301.27 | 0.987818 | 5.95631E-07 | volume |
| Citronellol                  | alcohols     | 22.9 | 0.78 | Volume(-) | 736130.411 | 3235752.75 | 0.99251  | 7.37487E-07 | volume |
| 1-Dodecanol                  | alcohols     | 29.5 | 0.69 | Volume(-) | 1675362.33 | -11839246  | 0.993296 | 1.27205E-06 | volume |
| Benzaldehyde                 | aldehydes    | 14.2 | 1.47 | Volume(-) | 295989.292 | 32923561.1 | 0.928861 | 5.62022E-07 | volume |
| Decanal                      | aldehydes    | 22.2 | 0.72 | Volume(-) | 90832.1943 | 30410602.5 | 0.91838  | 7.68249E-07 | volume |
| Citral                       | aldehydes    | 23.9 | 0.99 | Volume(-) | 476599.703 | 5532991.75 | 0.997937 | 1.03847E-06 | volume |
| Dodecanal                    | aldehydes    | 27.7 | 0.72 | Volume(-) | 613460.835 | 8672551.69 | 0.973318 | 7.06712E-07 | volume |
| 3-Carene                     | alkenes      | 16.6 | 0.6  | Volume(-) | 555477.598 | 2352661.96 | 0.996717 | 1.31338E-06 | volume |
| Formamide, N,N-dimethyl-     | amides       | 8.3  | 1.62 | Volume(-) | 639538.124 | -1756059.9 | 0.999197 | 1.89851E-06 | volume |
| N-Nitrosodimethylamine       | amines       | 7.2  | 1.44 | Volume(-) | 125347.589 | 17277719.5 | 0.915964 | 9.67984E-07 | volume |
| Toluene                      | aromatics    | 8.3  | 0.72 | Volume(-) | 111437.345 | 15552626.6 | 0.908394 | 1.13912E-06 | volume |
| Ethylbenzene                 | aromatics    | 11.3 | 0.75 | Volume(-) | 164716.114 | 7648261.32 | 0.993769 | 1.74172E-06 | volume |
| Benzene, 1,3-dimethyl-       | aromatics    | 11.6 | 0.72 | Volume(-) | 732906.039 | 7395867.46 | 0.999845 | 1.95158E-06 | volume |
| Styrene                      | aromatics    | 12.2 | 0.93 | Volume(-) | 382946.99  | 2598518.1  | 0.967069 | 2.51416E-06 | volume |
| o-Xylene                     | aromatics    | 12.3 | 0.84 | Volume(-) | 422382.202 | -1314510.3 | 0.963411 | 2.7499E-06  | volume |
| Benzene, (1-methylethyl)-    | aromatics    | 13.4 | 0.78 | Volume(-) | 548984.5   | 8129641.52 | 0.996125 | 1.13721E-06 | volume |
| Benzene, propyl-             | aromatics    | 14.4 | 0.78 | Volume(-) | 609446.518 | 12668627.1 | 0.999525 | 7.84626E-07 | volume |
| Biphenyl                     | aromatics    | 26.9 | 1.47 | Volume(-) | 833827.577 | 12937676.3 | 0.981003 | 5.22721E-07 | volume |
| Benzene, 1-chloro-4-phenoxy- | aromatics    | 32   | 1.56 | Volume(-) | 340005.725 | 15045138   | 0.99267  | 9.29891E-07 | volume |
| Cyclohexane-C6               | cycloalkanes | 23.7 | 0.51 | Volume(-) | 516190.948 | 24464884.6 | 0.995987 | 5.60808E-07 | volume |
| Cyclohexane-C7               | cycloalkanes | 26.5 | 0.51 | Volume(-) | 197535.205 | 27873753.2 | 0.952813 | 6.72421E-07 | volume |
| Cyclohexane-C8               | cycloalkanes | 29   | 6.54 | Volume(-) | 358018.607 | 25520410.2 | 0.9402   | 6.82893E-07 | volume |
| n-Propyl acetate             | esters       | 6.9  | 0.6  | Volume(-) | 172406.138 | 6510745.63 | 0.978575 | 1.13561E-06 | volume |
| sec-Butyl acetate            | esters       | 7.9  | 6.57 | Volume(-) | 365821.06  | 4516487.8  | 0.998136 | 1.15229E-06 | volume |

|                                                         |        |      |      |           |            |            |          |             |        |
|---------------------------------------------------------|--------|------|------|-----------|------------|------------|----------|-------------|--------|
| Propanoic acid, 2-chloro-, methyl ester                 | esters | 8.7  | 0.9  | Volume(-) | 206144.927 | 8670199.74 | 0.97375  | 9.95367E-07 | volume |
| Butanoic acid, ethyl ester                              | esters | 9.2  | 0.66 | Volume(-) | 138521.093 | 10530426.9 | 0.97704  | 8.0804E-07  | volume |
| Propanoic acid, 2-hydroxy-, ethyl ester                 | esters | 9.6  | 0.78 | Volume(-) | 237641.369 | 9228945.01 | 0.977146 | 8.03557E-07 | volume |
| Acetic acid, chloro-, ethyl ester                       | esters | 10.1 | 1.08 | Volume(-) | 636784.626 | 3482306.52 | 0.99672  | 9.18225E-07 | volume |
| Acetic acid, hexyl ester                                | esters | 16.3 | 0.69 | Volume(-) | 584635.045 | 3691577.98 | 0.999881 | 1.01926E-06 | volume |
| Acetic acid, phenylmethyl ester                         | esters | 20.7 | 1.32 | Volume(-) | 1047153.31 | -2856342.3 | 0.998769 | 1.12506E-06 | volume |
| Benzeneacetic acid, ethyl ester                         | esters | 23   | 1.29 | Volume(-) | 776055.212 | 4430225.49 | 0.984715 | 8.93401E-07 | volume |
| Acetic acid, 2-phenylethyl ester                        | esters | 23.4 | 1.29 | Volume(-) | 660762.445 | 9186511.08 | 0.995017 | 6.24023E-07 | volume |
| Linalyl acetate                                         | esters | 23.6 | 6.69 | Volume(-) | 575136.95  | -6733826   | 1        |             |        |
| Benzeneethanol, dimethyl-, acetate                      | esters | 25.3 | 1.02 | Volume(-) | 918069.484 | 3341459.89 | 0.97681  | 1.1607E-06  | volume |
| 2,2,4-Trimethyl-1,3-pentanediol diisobutyrate           | esters | 26.9 | 0.81 | Volume(-) | 414581.406 | 13288013.6 | 0.93362  | 1.20476E-06 | volume |
| Dimethyl phthalate                                      | esters | 28.4 | 1.86 | Volume(-) | 382161.965 | 4090570.92 | 0.970216 | 1.5413E-06  | volume |
| Diethyl Phthalate                                       | esters | 31.7 | 1.65 | Volume(-) | 347421.027 | 2214076.87 | 0.994984 | 1.87418E-06 | volume |
| Dibutyl adipate                                         | esters | 35.6 | 0.99 | Volume(-) | 654608.34  | 28310250.9 | 0.970301 | 5.38476E-07 | volume |
| Benzyl Benzoate                                         | esters | 35.6 | 1.89 | Volume(-) | 1198995.63 | 13776826.8 | 0.994584 | 4.19534E-07 | volume |
| 1,2-Benzenedicarboxylic acid, bis(2-methylpropyl) ester | esters | 37.5 | 1.38 | Volume(-) | 720445.973 | 26780920.3 | 0.99221  | 4.84178E-07 | volume |
| Dibutyl phthalate                                       | esters | 39.3 | 1.47 | Volume(-) | 490263.071 | 26288201   | 0.915778 | 6.12372E-07 | volume |
| Benzyl butyl phthalate                                  | esters | 45.9 | 2.58 | Volume(-) | 599420.415 | 29148243.9 | 0.952222 | 5.53382E-07 | volume |
| Hexanedioic acid, bis(2-ethylhexyl) ester               | esters | 47.2 | 1.2  | Volume(-) | 1403558.03 | -1591044   | 0.989732 | 5.29825E-07 | volume |
| Bis(2-ethylhexyl) phthalate                             | esters | 50.2 | 2.22 | Volume(-) | 990602.44  | 35974273.4 | 0.98858  | 3.66661E-07 | volume |
| Di-N-octyl phthalate                                    | esters | 53.6 | 1.56 | Volume(-) | 970681.25  | 49149986.3 | 0.994088 | 2.8276E-07  | volume |
| n-Butyl ether                                           | ethers | 12.2 | 0.48 | Volume(-) | 543706.17  | 522042.965 | 0.989505 | 1.70108E-06 | volume |

|                                        |             |      |      |           |            |            |          |             |        |
|----------------------------------------|-------------|------|------|-----------|------------|------------|----------|-------------|--------|
| Bis(2-chloroethyl) ether               | ethers      | 14.9 | 1.26 | Volume(-) | 293251.721 | 10112408.2 | 0.981181 | 1.18076E-06 | volume |
| Bis(2-chloro-1-methylethyl) ether      | ethers      | 17.4 | 0.93 | Volume(-) | 502820.195 | 20511710.8 | 0.982945 | 6.41801E-07 | volume |
| Methane, bis(2-chloroethoxy)-          | ethers      | 20.5 | 1.29 | Volume(-) | 789231.604 | 29903803.5 | 0.996062 | 4.49011E-07 | volume |
| Diphenyl ether                         | ethers      | 27.4 | 1.5  | Volume(-) | 1502301.27 | 1056835.95 | 0.994182 | 5.60487E-07 | volume |
| Dibenzofuran                           | ethers      | 30.3 | 1.68 | Volume(-) | 456697.98  | 27947696.2 | 0.946373 | 5.86123E-07 | volume |
| Benzene, 1-chloro-2-(trifluoromethyl)- | halocarbons | 10.9 | 0.63 | Volume(-) | 408718.749 | 5998995.16 | 0.986613 | 9.48426E-07 | volume |
| Benzene, 1,3-dichloro-                 | halocarbons | 15.9 | 1.05 | Volume(-) | 253717.267 | 5558043.85 | 0.999359 | 1.89426E-06 | volume |
| Benzene, 1,4-dichloro-                 | halocarbons | 16.1 | 1.08 | Volume(-) | 477669.97  | 2813017.91 | 0.994554 | 8.93244E-07 | volume |
| Benzene, 1,2-dichloro-                 | halocarbons | 16.9 | 1.14 | Volume(-) | 417706.139 | 10280963.4 | 0.981112 | 8.99799E-07 | volume |
| Ethane, hexachloro-                    | halocarbons | 18.4 | 0.93 | Volume(-) | 178919.348 | 10358046.7 | 0.983889 | 1.59793E-06 | volume |
| Benzene, 1,2,4-trichloro-              | halocarbons | 21.4 | 1.14 | Volume(-) | 986872.498 | 2585774.85 | 0.997446 | 1.0402E-06  | volume |
| 1,3-Butadiene, 1,1,2,3,4,4-hexachloro- | halocarbons | 22.8 | 0.84 | Volume(-) | 159192.86  | 16639933.2 | 0.994979 | 1.0209E-06  | volume |
| Naphthalene, 2-chloro-                 | halocarbons | 26.8 | 1.53 | Volume(-) | 427755.267 | 32539597.8 | 0.993208 | 4.91567E-07 | volume |
| Benzene, 1-bromo-4-phenoxy-            | halocarbons | 34.1 | 1.74 | Volume(-) | 509885.978 | 10320899.6 | 0.977821 | 9.76793E-07 | volume |
| Benzene, hexachloro-                   | halocarbons | 34.8 | 1.41 | Volume(-) | 145535.96  | 16932293.4 | 0.973847 | 1.05536E-06 | volume |
| Indole                                 | indoles     | 24.4 | 2.1  | Volume(-) | 1160645.73 | 13181754.1 | 0.993281 | 3.65726E-07 | volume |
| Cyclohexanone                          | ketones     | 11.8 | 1.35 | Volume(-) | 768571.842 | 13246450.7 | 0.977102 | 5.0048E-07  | volume |
| 3-Heptanone                            | ketones     | 11.9 | 0.75 | Volume(-) | 337670.212 | 10556939.7 | 0.997361 | 1.12921E-06 | volume |
| 5-Hepten-2-one, 6-methyl-              | ketones     | 15.3 | 0.87 | Volume(-) | 715277.453 | 6622011.06 | 0.996124 | 7.36244E-07 | volume |
| Acetophenone                           | ketones     | 17.7 | 1.5  | Volume(-) | 803630.829 | 15811130.1 | 0.987278 | 3.73598E-07 | volume |
| Isophorone                             | ketones     | 19.4 | 1.2  | Volume(-) | 232077.139 | 19913900.5 | 0.99291  |             |        |
| Camphor                                | ketones     | 20.3 | 1.14 | Volume(-) | 754493.313 | 4795306.75 | 0.984681 | 7.43488E-07 | volume |
| C7                                     | n-alkanes   | 6.8  | 0.3  | Volume(-) | 127233.285 | 17592558.7 | 0.936707 | 9.04836E-07 | volume |
| C8                                     | n-alkanes   | 9.5  | 6.36 | Volume(-) | 211176.589 | 24792624.8 | 0.936172 | 7.04735E-07 | volume |
| C9                                     | n-alkanes   | 12.9 | 6.36 | Volume(-) | 494690.974 | 6730391.63 | 0.999576 | 1.98022E-06 | volume |

|                                |                 |      |      |           |            |            |          |             |        |
|--------------------------------|-----------------|------|------|-----------|------------|------------|----------|-------------|--------|
| C10                            | n-alkanes       | 16.3 | 6.39 | Volume(-) | 310360.825 | 28307147   | 0.995473 | 5.83555E-07 | volume |
| C11                            | n-alkanes       | 19.6 | 0.39 | Volume(-) | 217524.065 | 30446956.6 | 0.997817 | 5.72834E-07 | volume |
| C12                            | n-alkanes       | 22.6 | 0.39 | Volume(-) | 371224.26  | 24216171.2 | 0.996241 | 6.49594E-07 | volume |
| C13                            | n-alkanes       | 25.3 | 0.42 | Volume(-) | 380560.135 | 38157001.7 | 0.986857 | 4.32196E-07 | volume |
| C14                            | n-alkanes       | 27.9 | 0.42 | Volume(-) | 126513.725 | 52109622.5 | 0.831378 | 3.75098E-07 | volume |
| C15                            | n-alkanes       | 30.4 | 0.45 | Volume(-) | 314167.78  | 45032615.7 | 0.95676  | 3.96835E-07 | volume |
| C16                            | n-alkanes       | 32.6 | 6.45 | Volume(-) | 499091.898 | 16637226.6 | 0.998321 | 5.15652E-07 | volume |
| C17                            | n-alkanes       | 34.8 | 6.45 | Volume(-) | 429261.04  | 47836313.6 | 0.964208 | 3.71499E-07 | volume |
| C18                            | n-alkanes       | 36.9 | 0.48 | Volume(-) | 1071200.05 | 25711698.7 | 0.905911 | 3.6825E-07  | volume |
| C19                            | n-alkanes       | 38.8 | 6.51 | Volume(-) | 542664.277 | 25649099.4 | 0.939338 | 4.44948E-07 | volume |
| C20                            | n-alkanes       | 40.8 | 0.51 | Volume(-) | 798637.067 | 42583916.1 | 0.98845  | 3.59932E-07 | volume |
| C21                            | n-alkanes       | 42.5 | 0.54 | Volume(-) | 625403.925 | 52123220   | 0.996117 | 3.13097E-07 | volume |
| C22                            | n-alkanes       | 44.2 | 0.54 | Volume(-) | 738515.729 | 49371822.1 | 0.986974 | 3.16644E-07 | volume |
| C23                            | n-alkanes       | 45.9 | 0.63 | Volume(-) | 468679.568 | 68021690.5 | 0.822762 | 2.76351E-07 | volume |
| C24                            | n-alkanes       | 47.8 | 0.78 | Volume(-) | 1642492.32 | 34264579.6 | 0.987253 | 2.08419E-07 | volume |
| C25                            | n-alkanes       | 50   | 0.99 | Volume(-) | 1006802.22 | 52180805.5 | 0.979821 | 2.64363E-07 | volume |
| C26                            | n-alkanes       | 52.1 | 0.69 | Volume(-) | 1071560.9  | 73193410   | 0.98666  | 2.05124E-07 | volume |
| C27                            | n-alkanes       | 53.7 | 0.69 | Volume(-) | 297997.175 | 79536129   | 0.924074 | 2.40992E-07 | volume |
| C28                            | n-alkanes       | 55.4 | 0.81 | Volume(-) | 1248237.68 | 71716056   | 0.984305 | 2.1496E-07  | volume |
| C29                            | n-alkanes       | 57.2 | 0.99 | Volume(-) | 1511457.41 | 45597776.5 | 0.995881 | 2.71805E-07 | volume |
| C30                            | n-alkanes       | 59.4 | 1.23 | Volume(-) | 985551.162 | 47138362.2 | 0.927356 | 3.14148E-07 | volume |
| C31                            | n-alkanes       | 62   | 1.5  | Volume(-) | 1153965.03 | 39361148.5 | 0.89353  | 3.75649E-07 | volume |
| C32                            | n-alkanes       | 65.1 | 1.83 | Volume(-) | 2862892.86 | 889904.262 | 0.933398 | 2.70115E-07 | volume |
| Benzonitrile                   | nitriles        | 14.8 | 1.62 | Volume(-) | 669404.017 | 5322867.01 | 0.982467 | 6.72332E-07 | volume |
| Benzene, nitro-                | nitro-aromatics | 18.2 | 1.65 | Volume(-) | 410963.785 | 11364083.8 | 0.968992 | 2.14487E-06 | volume |
| Benzene, 2-methyl-1,3-dinitro- | nitro-aromatics | 28.1 | 2.25 | Volume(-) | 302991.52  | 15797394.3 | 0.983646 | 9.25809E-07 | volume |
| Methyl thiolacetate            | others          | 6.5  | 0.75 | Volume(-) | 119179.768 | 3575346.35 | 0.992657 | 2.06874E-06 | volume |

|                                   |         |      |      |           |            |            |          |             |        |  |
|-----------------------------------|---------|------|------|-----------|------------|------------|----------|-------------|--------|--|
| S-Methyl<br>methanethiosulphonate | others  | 17   | 2.73 | Volume(-) | 572472.9   | 4641170    |          | 1           |        |  |
| p-Chloroaniline                   | others  | 21.9 | 1.8  | Volume(-) | 617262.11  | 15491041.7 | 0.96358  | 8.55657E-07 | volume |  |
| Caprolactam                       | others  | 22.9 | 2.52 | Volume(-) | 1053287.34 | 11054585   | 0.998908 |             |        |  |
| Quinoline                         | others  | 23   | 1.8  | Volume(-) | 978932.614 | 13926338.9 | 0.99825  | 3.95047E-07 | volume |  |
| o-Nitroaniline                    | others  | 27.2 | 2.37 | Volume(-) | 323997.815 | 12291086.1 | 0.97491  | 1.18862E-06 | volume |  |
| m-Nitroaniline                    | others  | 29.2 | 2.55 | Volume(-) | 396400.993 | 12145274   | 0.947652 | 1.11597E-06 | volume |  |
| p-Nitroaniline                    | others  | 32   | 3    | Volume(-) | 402928.829 | 16312345   | 0.987711 | 8.57156E-07 | volume |  |
| Azobenzene                        | others  | 32.7 | 1.68 | Volume(-) | 457013.25  | 27266753.5 | 0.964036 | 5.99565E-07 | volume |  |
| Carbazole                         | others  | 37.1 | 2.64 | Volume(-) | 736675.895 | 38880331.3 | 0.979556 | 3.88567E-07 | volume |  |
| Naphthalene                       | PAHs    | 21.6 | 1.44 | Volume(-) | 578826.2   | 26016002.5 | 0.980146 | 5.57522E-07 | volume |  |
| Naphthalene, 2-methyl-            | PAHs    | 24.8 | 1.35 | Volume(-) | 876151.23  | 56066828.7 | 0.975523 | 2.9039E-07  | volume |  |
| Acenaphthylene                    | PAHs    | 28.6 | 1.83 | Volume(-) | 560799.725 | 25808574   | 0.955881 | 6.11109E-07 | volume |  |
| Acenaphthene                      | PAHs    | 29.5 | 1.74 | Volume(-) | 369008.255 | 31445652.2 | 0.926645 | 5.70039E-07 | volume |  |
| Fluorene                          | PAHs    | 31.9 | 1.74 | Volume(-) | 770538.355 | 25457595.5 | 0.986952 | 5.24415E-07 | volume |  |
| Phenanthrene                      | PAHs    | 36.1 | 2.16 | Volume(-) | 509837.45  | 23180085.3 | 0.98984  | 6.27002E-07 | volume |  |
| Anthracene                        | PAHs    | 36.3 | 2.13 | Volume(-) | 541299.735 | 41284837.2 | 0.982082 | 4.04086E-07 | volume |  |
| Fluoranthene                      | PAHs    | 41.5 | 2.46 | Volume(-) | 608302.25  | 40499272.8 | 0.952228 | 4.20267E-07 | volume |  |
| Pyrene                            | PAHs    | 42.4 | 2.7  | Volume(-) | 709976.78  | 46290854.7 | 0.973638 | 3.55256E-07 | volume |  |
| Benz[a]anthracene                 | PAHs    | 48.4 | 4.5  | Volume(-) | 563148.46  | 21107461.4 | 0.987229 | 6.6125E-07  | volume |  |
| Chrysene                          | PAHs    | 48.6 | 4.77 | Volume(-) | 843500.82  | 49198941.6 | 0.977413 | 3.23077E-07 | volume |  |
| Benzo[b]fluoranthene              | PAHs    | 54.3 | 4.08 | Volume(-) | 1939792.71 | 36919246.5 | 0.958022 | 2.5317E-07  | volume |  |
| Benzo[k]fluoranthene              | PAHs    | 55.9 | 5.34 | Volume(-) | 664575.175 | 26418826.3 | 0.98293  | 5.4029E-07  | volume |  |
| Benzo[ghi]perylene                | PAHs    | 62.9 | 4.53 | Volume(-) | 1489621.91 | 58637845.5 | 0.948007 | 2.48837E-07 | volume |  |
| Indeno[1,2,3-cd]pyrene            | PAHs    | 64.8 | 6.6  | Volume(-) | 412808.996 | 33364647.9 | 0.964393 | 7.83547E-07 | volume |  |
| Phenol                            | phenols | 15.3 | 1.17 | Volume(-) | 699127.973 | 19878129.3 | 0.993664 | 5.62012E-07 | volume |  |
| Phenol, 2-chloro-                 | phenols | 15.6 | 1.14 | Volume(-) | 426779.07  | 2677929.55 | 0.984874 | 1.85234E-06 | volume |  |
| Phenol, 3-methyl-                 | phenols | 18.3 | 1.2  | Volume(-) | 1482562.79 | 22941359.6 | 0.996644 | 3.73146E-07 | volume |  |

|                                      |           |      |      |           |            |            |          |             |        |
|--------------------------------------|-----------|------|------|-----------|------------|------------|----------|-------------|--------|
| Phenol, 2,6-dimethyl-                | phenols   | 19.1 | 1.26 | Volume(-) | 559906.312 | 42982305.7 | 0.965926 | 3.87076E-07 | volume |
| Phenol, 2-nitro-                     | phenols   | 19.8 | 1.44 | Volume(-) | 284768.398 | 4284557.77 | 0.99974  | 2.03651E-06 | volume |
| Phenol, 2-methyl-                    | phenols   | 19.8 | 0.96 | Volume(-) | 1588271.67 | -20574066  | 0.999699 | 1.69098E-06 | volume |
| Phenol, 2,4-dichloro-                | phenols   | 21.3 | 1.2  | Volume(-) | 924474.084 | 2798422.37 | 0.993005 | 8.22116E-07 | volume |
| Phenol, 4-chloro-                    | phenols   | 22.2 | 1.32 | Volume(-) | 870925.718 | 17430419.3 | 0.985047 | 6.02054E-07 | volume |
| Phenol, 2,4,6-trichloro-             | phenols   | 26.3 | 1.32 | Volume(-) | 315307.115 | 10058400.4 | 0.978778 | 1.36416E-06 | volume |
| Phenol, 2,4,5-trichloro-             | phenols   | 26.7 | 1.29 | Volume(-) | 329541.557 | 8884883.42 | 0.953355 | 1.21679E-06 | volume |
| 1-Naphthalenol                       | phenols   | 30.1 | 1.98 | Volume(-) | 516104.751 | 10297562.6 | 0.996501 | 1.01218E-06 | volume |
| 2-Naphthalenol                       | phenols   | 30.3 | 2.04 | Volume(-) | 1126467.21 | 17204599   | 0.997854 | 5.08909E-07 | volume |
| Pyridine, 3,5-dichloro-              | Pyridines | 15.9 | 1.08 | Volume(-) | 656722.314 | 12940893.5 | 0.976672 | 5.87393E-07 | volume |
| Cyclotetrasiloxane, octamethyl-(D4)  | siloxanes | 16.5 | 6.21 | Volume(-) | 302876.828 | 19176043.3 | 0.952888 | 8.72126E-07 | volume |
| Cyclopentasiloxane, decamethyl-(D5)  | siloxanes | 21.5 | 6.24 | Volume(-) | 167993.887 | 15440281.7 | 0.992134 | 1.09289E-06 | volume |
| Cyclohexasiloxane, dodecamethyl-(D6) | siloxanes | 26.4 | 6.21 | Volume(-) | 128048.569 | 9832029.38 | 0.997709 | 1.62309E-06 | volume |

20

21



22 **Table S3.** Chemicals quantified, with volatility and polarity bins, MIR, *k*OH, and SOA yields. The SOA yields of precursors were from literature  
 23 (Loza et al., 2014; Harvey and Petrucci, 2015; Tkacik et al., 2012; Shah et al., 2020; McDonald et al., 2018; Chan et al., 2010, 2009; Wu et al.,  
 24 2017; Li et al., 2016; Matsunaga et al., 2009; Algrim and Ziemann, 2019, 2016; Liu et al., 2018; Charan et al., 2020) or surrogates from *n*-alkanes  
 25 in the same volatility bins (Zhao et al., 2014, 2017).

| compound                          | class_detail | bins      | VBS         | VOCs  | bins_2D | MIR  | <i>k</i> OH<br>(10 <sup>12</sup> ) | <i>k</i> OH_reference    | yield | yield_surrogate | yield_reference   |
|-----------------------------------|--------------|-----------|-------------|-------|---------|------|------------------------------------|--------------------------|-------|-----------------|-------------------|
| Acetic acid                       | acids        | B8_before | more_than_6 | VOCs  | P2      | 0.68 | 0.622                              | AopWin                   |       |                 |                   |
| Propanoic acid                    | acids        | B8_before | more_than_6 | VOCs  | P2      | 1.22 | 1.3878                             | AopWin                   |       |                 |                   |
| Propanoic acid, 2-methyl-         | acids        | B8_before | more_than_6 | VOCs  | P3      | 1.2  | 2.3096                             | AopWin                   |       |                 |                   |
| Butanoic acid                     | acids        | B8        | more_than_6 | VOCs  | P2      | 1.82 | 2.6977                             | AopWin                   |       |                 |                   |
| Maleic anhydride                  | acids        | B8        | more_than_6 | VOCs  | P6      | 1.82 |                                    |                          |       |                 |                   |
| Isocrotonic acid                  | acids        | B8        | more_than_6 | VOCs  | P2      | 1.82 |                                    |                          |       |                 |                   |
| 2,5-Furandione, dihydro-3-methyl- | acids        | B10       | more_than_6 | VOCs  | P6      |      |                                    |                          |       |                 |                   |
| Benzoic acid                      | acids        | B12       | 6           | IVOCs | P3      |      | 1.242                              | AopWin v1.92             | 0.02  | C12             | Chan et al., 2009 |
| Nonanoic acid                     | acids        | B13       | 6           | IVOCs | P2      |      | 9.763                              | AopWin v1.92             | 0.03  | C13             | Chan et al., 2009 |
| 1,2-Benzenedicarboxylic acid      | acids        | B13       | 6           | IVOCs | P5      | 2.58 | 0.7492                             |                          |       |                 |                   |
| 2-Propanone, 1-hydroxy-           | alcohols     | B8_before | more_than_6 | VOCs  | P3      | 3.23 | 2.6938                             | AopWin                   |       |                 |                   |
| 1-Butanol                         | alcohols     | B8_before | more_than_6 | VOCs  | P2      | 2.88 | 8.5                                | (Atkinson and Arey,2003) | 0     |                 | Wu et al., 2017   |
| 1-Hydroxy-2-butanone              | alcohols     | B8_before | more_than_6 | VOCs  | P3      |      |                                    |                          |       |                 |                   |
| 2-Furanol, tetrahydro-            | alcohols     | B8        | more_than_6 | VOCs  | P2      |      |                                    |                          |       |                 |                   |
| 1-Hexen-3-ol                      | alcohols     | B8        | more_than_6 | VOCs  | P2      | 2.88 | 8.5                                |                          |       |                 |                   |
| 2-Furanmethanol, tetrahydro-      | alcohols     | B8        | more_than_6 | VOCs  | P3      | 3.31 | 23.5819                            | AopWin                   |       |                 |                   |
| 3-Penten-1-ol, 3-methyl-          | alcohols     | B8        | more_than_6 | VOCs  | P3      | 2.88 | 8.5                                |                          |       |                 |                   |
| 2-Hexen-1-ol, (E)-                | alcohols     | B9        | more_than_6 | VOCs  | P3      | 2.88 | 8.5                                |                          |       |                 |                   |
| 4-Hepten-1-ol                     | alcohols     | B9        | more_than_6 | VOCs  | P3      | 2.88 | 8.5                                |                          |       |                 |                   |

|                                                                                     |          |     |             |       |    |      |          |              |     |                |                     |
|-------------------------------------------------------------------------------------|----------|-----|-------------|-------|----|------|----------|--------------|-----|----------------|---------------------|
| <b>2-Cyclohexen-1-ol</b>                                                            | alcohols | B9  | more_than_6 | VOCs  | P4 | 2.88 |          |              |     |                |                     |
| <b>2-Cyclopenten-1-one, 2-hydroxy-</b>                                              | alcohols | B9  | more_than_6 | VOCs  | P4 | 2.88 |          |              |     |                |                     |
| <b>Ethanol, 2-butoxy-</b>                                                           | alcohols | B9  | more_than_6 | VOCs  | P2 | 2.9  | 23.5134  | AopWin       |     |                |                     |
| <b>Cyclopropanemethanol, <math>\alpha</math>-methyl-<math>\alpha</math>-propyl-</b> | alcohols | B10 | more_than_6 | VOCs  | P4 |      |          |              |     |                |                     |
| <b>4-Hepten-3-ol, 4-methyl-</b>                                                     | alcohols | B10 | more_than_6 | VOCs  | P3 | 2.88 |          |              |     |                |                     |
| <b>2-Propanol, 1-(2-methoxypropoxy)-</b>                                            | alcohols | B10 | more_than_6 | VOCs  | P2 | 1.83 |          |              |     |                |                     |
| <b>2-Propanol, 1,1'-oxybis-</b>                                                     | alcohols | B10 | more_than_6 | VOCs  | P3 | 2.31 | 31.3336  | AopWin       |     |                |                     |
| <b>Benzyl alcohol</b>                                                               | alcohols | B10 | more_than_6 | VOCs  | P3 | 5.11 | 8.2541   | AopWin       | 0.6 |                | Charan et al., 2020 |
| <b>1,2-Cyclohexanediol</b>                                                          | alcohols | B10 | more_than_6 | VOCs  | P4 |      |          |              |     |                |                     |
| <b>1-Hexanol, 2-ethyl-</b>                                                          | alcohols | B10 | more_than_6 | VOCs  | P2 | 2    | 13.2292  | AopWin v1.92 |     |                |                     |
| <b>1-Propanol, 2,2'-oxybis-</b>                                                     | alcohols | B10 | more_than_6 | VOCs  | P3 |      |          |              |     |                |                     |
| <b>2-Propyl-1-pentanol</b>                                                          | alcohols | B11 | more_than_6 | VOCs  | P2 | 2    |          |              |     |                |                     |
| <b>Benzenemethanol, <math>\alpha</math>,<math>\alpha</math>-dimethyl-</b>           | alcohols | B11 | more_than_6 | VOCs  | P3 |      |          |              | 0.6 | Benzyl alcohol | Charan et al., 2020 |
| <b>7-Octen-2-ol, 2,6-dimethyl-</b>                                                  | alcohols | B11 | more_than_6 | VOCs  | P2 | 2.88 |          |              |     |                |                     |
| <b>1-Nonanol</b>                                                                    | alcohols | B11 | more_than_6 | VOCs  | P2 |      | 13.9553  | AopWin v1.92 |     |                |                     |
| <b>Cyclohexanol, 1-methyl-4-(1-methylethenyl)-</b>                                  | alcohols | B11 | more_than_6 | VOCs  | P2 |      |          |              |     |                |                     |
| <b>3,7-Octadiene-2,6-diol, 2,6-dimethyl-</b>                                        | alcohols | B12 | 6           | IVOCs | P2 |      |          |              |     |                |                     |
| <b><math>\alpha</math>-Terpineol</b>                                                | alcohols | B12 | 6           | IVOCs | P2 | 4.63 | 103.0734 | AopWin       |     |                |                     |
| <b>1,4:3,6-Dianhydro-<math>\alpha</math>-D-glucopyranose</b>                        | alcohols | B12 | 6           | IVOCs | P5 |      |          |              |     |                |                     |

|                                             |           |           |             |       |    |       |         |                            |       |                 |  |                    |                   |
|---------------------------------------------|-----------|-----------|-------------|-------|----|-------|---------|----------------------------|-------|-----------------|--|--------------------|-------------------|
| <b>Cyclohexanol, 4-(1,1-dimethylethyl)-</b> | alcohols  | B12       | 6           | IVOCs | P2 |       |         |                            |       |                 |  |                    |                   |
| <b>1-Octanol, 2-butyl-</b>                  | alcohols  | B12       | 6           | IVOCs | P2 |       | 13.9553 | AopWin v1.92               |       |                 |  |                    |                   |
| <b>2-Decen-1-ol, (E)-</b>                   | alcohols  | B12       | 6           | IVOCs | P2 | 2.88  | 13.9553 | AopWin v1.92               |       |                 |  |                    |                   |
| <b>Eugenol</b>                              | alcohols  | B13       | 6           | IVOCs | P3 |       |         |                            |       |                 |  |                    |                   |
| <b>Cedrol</b>                               | alcohols  | B16       | 5           | IVOCs | P3 |       | 20.1453 | AopWin v1.92               | 0.08  | C15             |  | Chan et al., 2009  |                   |
| <b>Patchouli alcohol</b>                    | alcohols  | B17       | 4           | IVOCs | P3 |       |         |                            |       |                 |  |                    |                   |
| <b>Methyl glyoxal</b>                       | aldehydes | B8_before | more_than_6 | VOCs  | P1 | 16.56 | 15      | (Atkinson and Arey,2003)   |       |                 |  |                    |                   |
| <b>2-Butenal, (E)-</b>                      | aldehydes | B8_before | more_than_6 | VOCs  | P8 |       | 35      | (A. W. H. Chan et al,2010) | 0.02  |                 |  | Chan et al., 2010; | Fang et al., 2017 |
| <b>2-Butenal, 2-methyl-</b>                 | aldehydes | B8_before | more_than_6 | VOCs  | P4 |       | 35      |                            | 0.02  | 2-Butenal, (E)- |  | Chan et al., 2010; | Fang et al., 2017 |
| <b>Succindialdehyde</b>                     | aldehydes | B8_before | more_than_6 | VOCs  | P5 |       |         |                            |       |                 |  |                    |                   |
| <b>Furfural</b>                             | aldehydes | B8        | more_than_6 | VOCs  | P4 | 4.35  | 37.4206 | AopWin                     |       |                 |  |                    |                   |
| <b>2-Hexenal, (E)-</b>                      | aldehydes | B8        | more_than_6 | VOCs  | P3 | 4.35  | 35      |                            | 0.02  | 2-Butenal, (E)- |  | Chan et al., 2010; | Fang et al., 2017 |
| <b>Glutaraldehyde</b>                       | aldehydes | B9        | more_than_6 | VOCs  | P4 | 4.31  | 46.8857 | AopWin                     |       |                 |  |                    |                   |
| <b>2-Butenal, 2-ethenyl-</b>                | aldehydes | B9        | more_than_6 | VOCs  | P3 |       | 35      |                            |       |                 |  |                    |                   |
| <b>2-Pentenal, 2-methyl-</b>                | aldehydes | B9        | more_than_6 | VOCs  | P5 |       | 35      |                            | 0.02  | 2-Butenal, (E)- |  | Chan et al., 2010; | Fang et al., 2017 |
| <b>Hexanal, 2-ethyl-</b>                    | aldehydes | B9        | more_than_6 | VOCs  | P2 | 4.35  | 30      |                            | 0.02  | 2-Butenal, (E)- |  | Chan et al., 2010; | Fang et al., 2017 |
| <b>Benzaldehyde</b>                         | aldehydes | B9        | more_than_6 | VOCs  | P3 |       | 12      | (Atkinson and Arey,2003)   | 0.38  |                 |  | Fang et al., 2017  |                   |
| <b>Octanal</b>                              | aldehydes | B10       | more_than_6 | VOCs  | P4 | 3.16  | 31.657  | AopWin v1.92               | 0.026 |                 |  | Chan et al., 2010  |                   |
| <b>Nonanal</b>                              | aldehydes | B11       | more_than_6 | VOCs  | P2 | 3.16  | 33.07   | AopWin v1.92               | 0.026 |                 |  | Chan et al., 2010  |                   |
| <b>(Z)-3-Phenylacrylaldehyde</b>            | aldehydes | B12       | 6           | IVOCs | P4 |       |         |                            |       |                 |  |                    |                   |
| <b>Decanal</b>                              | aldehydes | B12       | 6           | IVOCs | P2 | 3.16  | 34.48   | AopWin v1.92               | 0.026 |                 |  | Chan et al., 2010  |                   |
| <b>Undecanal</b>                            | aldehydes | B13       | 6           | IVOCs | P2 | 3.16  |         |                            | 0.026 |                 |  | Chan et al., 2010  |                   |

|                                       |           |           |             |       |    |      |         |                          |  |       |          |  |                          |
|---------------------------------------|-----------|-----------|-------------|-------|----|------|---------|--------------------------|--|-------|----------|--|--------------------------|
| <b>2-Propenal, 2-methyl-3-phenyl-</b> | aldehydes | B13       | 6           | IVOCs | P4 |      |         |                          |  |       |          |  |                          |
| <b>Vanillin</b>                       | aldehydes | B14       | 6           | IVOCs | P4 |      |         | 12                       |  | 0.026 |          |  | Chan et al., 2010        |
| <b>Octanal, 2-(phenylmethylene)-</b>  | aldehydes | B17       | 4           | IVOCs | P3 | 2.96 | 54.9612 | AopWin                   |  |       |          |  |                          |
| <b>C7-ene</b>                         | n-alkenes | B8_before | more_than_6 | VOCs  | P4 | 4.43 | 40      | (Atkinson and Arey,2003) |  | 0.015 |          |  | Wu et al., 2017          |
| <b>C8-ene</b>                         | n-alkenes | B8        | more_than_6 | VOCs  | P4 | 3.25 | 33.0041 | AopWin                   |  | 0.015 | C7-ene   |  | Wu et al., 2017          |
| <b>C9-ene</b>                         | n-alkenes | B9        | more_than_6 | VOCs  | P1 | 2.6  | 34.4171 | AopWin                   |  | 0.154 |          |  | Matsunaga,<br>Aiko,2009  |
| <b>C10-ene</b>                        | n-alkenes | B10       | more_than_6 | VOCs  | P1 | 2.17 | 35.8302 | AopWin                   |  | 0.317 |          |  | Matsunaga,<br>Aiko,2009  |
| <b>C11-ene</b>                        | n-alkenes | B11       | more_than_6 | VOCs  | P1 | 1.87 | 37.2432 | AopWin                   |  | 0.344 |          |  | Matsunaga,<br>Aiko,2009  |
| <b>C12-ene</b>                        | n-alkenes | B12       | 6           | IVOCs | P1 | 1.64 | 38.6563 | AopWin                   |  | 0.468 |          |  | Matsunaga,<br>Aiko,2009  |
| <b>C13-ene</b>                        | n-alkenes | B13       | 6           | IVOCs | P2 | 1.48 | 40.0693 | AopWin                   |  | 0.459 |          |  | Matsunaga,<br>Aiko,2009  |
| <b>C14-ene</b>                        | n-alkenes | B14       | 6           | IVOCs | P2 | 1.34 | 41.4824 | AopWin                   |  | 0.501 |          |  | Matsunaga,<br>Aiko,2009  |
| <b>1,3-Nonadiene, (E)-</b>            | alkenes   | B9        | more_than_6 | VOCs  | P2 |      | 37.2432 |                          |  |       |          |  |                          |
| <b><math>\beta</math>-Pinene</b>      | alkenes   | B10       | more_than_6 | VOCs  | P2 | 3.52 | 74.3    | (Atkinson and Arey,2003) |  | 0.17  |          |  | Lee et al., 2006         |
| <b>Cyclohexene, 4-(1,1-</b>           | alkenes   | B10       | more_than_6 | VOCs  | P2 |      |         |                          |  |       |          |  |                          |
| <b>dimethylethyl)-</b>                |           |           |             |       |    |      |         |                          |  |       |          |  |                          |
| <b>Limonene</b>                       | alkenes   | B10       | more_than_6 | VOCs  | P2 | 4.55 | 164     | (Atkinson and Arey,2003) |  | 0.13  |          |  | McDonald et al.,<br>2018 |
| <b><math>\beta</math>-Ocimene</b>     | alkenes   | B10       | more_than_6 | VOCs  | P2 | 4.55 | 252     | (Atkinson and Arey,2003) |  | 0.13  | Limonene |  | McDonald et al.,<br>2018 |
| <b>Longifolene</b>                    | alkenes   | B14       | 6           | IVOCs | P2 | 4.55 | 47      | (Atkinson and Arey,2003) |  | 0.13  | Limonene |  | McDonald et al.,<br>2018 |
| <b><math>\alpha</math>-Cedrene</b>    | alkenes   | B14       | 6           | IVOCs | P2 | 4.55 | 67      | (Atkinson and Arey,2003) |  | 0.55  |          |  | Jaoui et al., 2013       |

|                                                                                                                                   |           |           |             |       |    |      |         |                          |       |                   |                    |
|-----------------------------------------------------------------------------------------------------------------------------------|-----------|-----------|-------------|-------|----|------|---------|--------------------------|-------|-------------------|--------------------|
| <b>8,9-Dimethylbicyclo[4.4.1]undeca-2,4,8-triene</b>                                                                              | alkenes   | B15       | 5           | IVOCs | P4 |      |         |                          | 0.55  | $\alpha$ -Cedrene | Jaoui et al., 2013 |
| <b>Aromandendrene</b>                                                                                                             | alkenes   | B15       | 5           | IVOCs | P2 | 4.55 | 67      |                          | 0.55  | $\alpha$ -Cedrene | Jaoui et al., 2013 |
| <b>4,9:5,8-Dimethano-1H-benz[f]indene, 3a,4,4a,5,8,8a,9,9a-octahydro-Kaur-16-ene, (8<math>\beta</math>,13<math>\beta</math>)-</b> | alkenes   | B21       | 3           | IVOCs | P3 | 4.55 | 67      |                          | 0.55  | $\alpha$ -Cedrene | Jaoui et al., 2013 |
| <b>Benzene</b>                                                                                                                    | aromatics | B8_before | more_than_6 | VOCs  | P2 | 0.72 | 1.22    | (Atkinson and Arey,2003) | 0.19  |                   | Chan et al., 2009  |
| <b>Toluene</b>                                                                                                                    | aromatics | B8        | more_than_6 | VOCs  | P2 | 4    | 5.63    | (Atkinson and Arey,2003) | 0.1   |                   | Chan et al., 2009  |
| <b>Ethylbenzene</b>                                                                                                               | aromatics | B9        | more_than_6 | VOCs  | P2 | 3.04 | 7       | (Atkinson and Arey,2003) | 0.1   |                   | Chan et al., 2009  |
| <b>p-Xylene</b>                                                                                                                   | aromatics | B9        | more_than_6 | VOCs  | P2 | 5.84 | 14.3    | (Atkinson and Arey,2003) | 0.06  |                   | Chan et al., 2009  |
| <b>Phenylethyne</b>                                                                                                               | aromatics | B9        | more_than_6 | VOCs  | P2 |      | 58      |                          | 0.22  | Styrene           | Fang et al., 2017  |
| <b>Styrene</b>                                                                                                                    | aromatics | B9        | more_than_6 | VOCs  | P2 | 1.73 | 58      | (Atkinson and Arey,2003) | 0.22  |                   | Fang et al., 2017  |
| <b>o-Xylene</b>                                                                                                                   | aromatics | B9        | more_than_6 | VOCs  | P2 | 7.64 | 13.6    | (Atkinson and Arey,2003) | 0.06  |                   | Chan et al., 2009  |
| <b>Bicyclo[4.2.0]octa-1,3,5-triene</b>                                                                                            | aromatics | B9        | more_than_6 | VOCs  | P2 |      |         |                          |       |                   |                    |
| <b>Benzene-C3-ene</b>                                                                                                             | aromatics | B9        | more_than_6 | VOCs  | P2 | 2.03 |         |                          | 0.1   | Benzene-C3        | Chan et al., 2009  |
| <b>Benzene, 2-propenyl-</b>                                                                                                       | aromatics | B10       | more_than_6 | VOCs  | P2 | 1.53 | 32.0791 | AopWin                   | 0.1   | Benzene-C3        | Chan et al., 2009  |
| <b>Benzene-C3</b>                                                                                                                 | aromatics | B9        | more_than_6 | VOCs  | P2 | 2.03 | 5.8     | (Atkinson and Arey,2003) | 0.1   |                   | Chan et al., 2009  |
| <b>Indane</b>                                                                                                                     | aromatics | B10       | more_than_6 | VOCs  | P3 | 3.32 | 19      | (Atkinson and Arey,2003) | 0.077 |                   | Gentner, 2012      |
| <b>Indene</b>                                                                                                                     | aromatics | B10       | more_than_6 | VOCs  | P3 | 1.55 | 78      | (Atkinson and Arey,2003) | 0.05  |                   | Fang et al., 2017  |
| <b>Indan, 1-methyl-</b>                                                                                                           | aromatics | B11       | more_than_6 | VOCs  | P2 | 3.32 | 19      |                          | 0.077 | Indane            | Gentner, 2012      |
| <b>Benzene-C4-ene</b>                                                                                                             | aromatics | B11       | more_than_6 | VOCs  | P2 | 2.36 | 8.723   |                          | 0.1   | Benzene-C3        | Chan et al., 2009  |
| <b>Benzene-C4</b>                                                                                                                 | aromatics | B10       | more_than_6 | VOCs  | P2 | 2.36 | 8.723   | AopWin                   | 0.1   | Benzene-C3        | Chan et al., 2009  |
| <b>1H-Indene, 2,3-dihydro-4-methyl-</b>                                                                                           | aromatics | B11       | more_than_6 | VOCs  | P3 |      | 78      |                          | 0.05  | Indene            | Fang et al., 2017  |
| <b>1H-Indene, 3-methyl-</b>                                                                                                       | aromatics | B11       | more_than_6 | VOCs  | P3 | 1.55 | 78      |                          | 0.05  | Indene            | Fang et al., 2017  |
| <b>Benzene-C6</b>                                                                                                                 | aromatics | B11       | more_than_6 | VOCs  | P2 | 2.12 | 10.1361 |                          | 0.1   | Benzene-C3        | Chan et al., 2009  |

|                                                        |             |     |             |       |    |       |         |                            |      |                               |                   |
|--------------------------------------------------------|-------------|-----|-------------|-------|----|-------|---------|----------------------------|------|-------------------------------|-------------------|
| <b>Naphthalene, 1,2,3,4-tetrahydro,C1</b>              | aromatics   | B13 | 6           | IVOCs | P3 | 2.97  | 34      |                            | 0.12 | Benzene, 1,2,3,4-tetramethyl- | Gentner, 2012     |
| <b>1H-Indene, 2,3-dihydro-4,7-dimethyl-</b>            | aromatics   | B13 | 6           | IVOCs | P3 |       |         |                            | 0.05 | Indene                        | Fang et al., 2017 |
| <b>Biphenyl</b>                                        | aromatics   | B14 | 6           | IVOCs | P3 | 3.34  | 7.1     | (Atkinson and Arey,2003)   | 0.26 | Naphthalene                   | Chan et al., 2009 |
| <b>Biphenyl-C1</b>                                     | aromatics   | B15 | 5           | IVOCs | P3 | 3.34  | 7.1     |                            | 0.33 | Naphthalene, 1-methyl-        | Chan et al., 2009 |
| <b>3,4,4a,9a-Tetrahydrofluorene</b>                    | aromatics   | B15 | 5           | IVOCs | P3 |       |         |                            |      |                               |                   |
| <b>Benzene, 1,1'-(1,2-cyclobutanediyl)bis-, trans-</b> | aromatics   | B17 | 4           | IVOCs | P4 |       | 10.1361 |                            |      |                               |                   |
| <b>Hexane, 2,4-dimethyl-</b>                           | b-alkanes   | B8  | more_than_6 | VOCs  | P4 | 1.73  | 8.5522  | AopWin                     |      |                               |                   |
| <b>B10_b_alkanes_UCM</b>                               | b-alkanes   | B9  | more_than_6 | VOCs  | P1 | 0.68  | 11      | (Atkinson and Arey,2003)   | 0.22 | C10                           | Wu et al., 2017   |
| <b>B11_b_alkanes_UCM</b>                               | b-alkanes   | B10 | more_than_6 | VOCs  | P1 | 0.68  | 11      |                            | 0.22 | C10                           | Wu et al., 2017   |
| <b>B12_b_alkanes_UCM</b>                               | b-alkanes   | B12 | 6           | IVOCs | P1 | 0.55  | 13.2    | (Atkinson and Arey,2003)   | 0.02 | C12                           | Chan et al., 2009 |
| <b>B13_b_alkanes_UCM</b>                               | b-alkanes   | B13 | 6           | IVOCs | P1 | 0.53  | 15.1    | (Atkinson and Arey,2003)   | 0.03 | C13                           | Chan et al., 2009 |
| <b>B14_b_alkanes_UCM</b>                               | b-alkanes   | B14 | 6           | IVOCs | P1 | 0.51  | 17.9    | (Atkinson and Arey,2003)   | 0.05 | C14                           | Chan et al., 2009 |
| <b>B15_b_alkanes_UCM</b>                               | b-alkanes   | B15 | 5           | IVOCs | P1 | 0.5   | 20.7    | (Atkinson and Arey,2003)   | 0.08 | C15                           | Chan et al., 2009 |
| <b>B16_b_alkanes_UCM</b>                               | b-alkanes   | B15 | 5           | IVOCs | P1 | 0.45  | 23.2    | (Atkinson and Arey,2003)   | 0.12 | C16                           | Chan et al., 2009 |
| <b>B17_b_alkanes_UCM</b>                               | b-alkanes   | B17 | 4           | IVOCs | P1 | 0.42  | 28.5    | (A. W. H. Chan et al,2009) | 0.2  | C17                           | Chan et al., 2009 |
| <b>B18_b_alkanes_UCM</b>                               | b-alkanes   | B18 | 4           | IVOCs | P1 | 0.4   | 35.1    | (A. W. H. Chan et al,2009) | 0.3  | C18                           | Chan et al., 2009 |
| <b>B19_b_alkanes_UCM</b>                               | b-alkanes   | B18 | 4           | IVOCs | P1 | 0.38  | 43.2    | (A. W. H. Chan et al,2009) | 0.42 | C19                           | Chan et al., 2009 |
| <b>B20_b_alkanes_UCM</b>                               | b-alkanes   | B20 | 3           | IVOCs | P1 | 0.36  | 53.1    | (A. W. H. Chan et al,2009) | 0.56 | C20                           | Chan et al., 2009 |
| <b>B21_b_alkanes_UCM</b>                               | b-alkanes   | B21 | 3           | IVOCs | P2 | 0.34  | 26.654  | AopWin v1.92               | 0.77 | C21                           | Gentner, 2012     |
| <b>Benzene, 1,3-dichloro-</b>                          | chlorides   | B10 | more_than_6 | VOCs  | P3 | 0.178 | 0.9649  | AopWin v1.92               |      |                               |                   |
| <b>Cyclohexane-C7</b>                                  | cyclohexane | B14 | 6           | IVOCs | P1 | 0.55  | 19.0567 | AopWin                     | 0.55 | Cyclohexane-C4                | Wu et al., 2017   |

s

|                                             |                  |           |             |       |    |       |         |              |       |                    |                          |
|---------------------------------------------|------------------|-----------|-------------|-------|----|-------|---------|--------------|-------|--------------------|--------------------------|
| <b>Cyclohexane-C8</b>                       | cyclohexane<br>s | B14       | 6           | IVOCs | P2 | 0.51  | 20.4697 | AopWin       | 0.55  | Cyclohexane-<br>C4 | Wu et al., 2017          |
| <b>Cyclohexane-C9</b>                       | cyclohexane<br>s | B16       | 5           | IVOCs | P2 | 0.47  | 21.8828 | AopWin       | 0.613 |                    | Lim and<br>Ziemann, 2009 |
| <b>Cyclohexane-C10</b>                      | cyclohexane<br>s | B17       | 4           | IVOCs | P2 | 0.43  | 23.2958 | AopWin       | 0.613 | Cyclohexane-<br>C9 | Lim and<br>Ziemann, 2009 |
| <b>Propanoic acid, ethenyl ester</b>        | esters           | B8_before | more_than_6 | VOCs  | P2 |       |         |              |       |                    |                          |
| <b>Methyl methacrylate</b>                  | esters           | B8_before | more_than_6 | VOCs  | P6 | 15.61 | 18.3436 | AopWin v1.92 |       |                    |                          |
| <b>Acetic acid, hydroxy-, methyl ester</b>  | esters           | B8_before | more_than_6 | VOCs  | P2 |       |         |              |       |                    |                          |
| <b>Acetic acid, butyl ester</b>             | esters           | B8        | more_than_6 | VOCs  | P2 | 0.83  | 4.6094  | AopWin       |       |                    |                          |
| <b>Butyrolactone</b>                        | esters           | B9        | more_than_6 | VOCs  | P6 | 0.96  | 2.3087  | AopWin       |       |                    |                          |
| <b>2(5H)-Furanone</b>                       | esters           | B9        | more_than_6 | VOCs  | P6 | 0.96  | 12.2364 |              |       |                    |                          |
| <b>2(5H)-Furanone, 5-methyl-</b>            | esters           | B9        | more_than_6 | VOCs  | P5 | 0.96  | 12.2364 |              |       |                    |                          |
| <b>2(3H)-Furanone, dihydro-3-methyl-</b>    | esters           | B9        | more_than_6 | VOCs  | P5 | 0.96  | 2.7214  | AopWin v1.92 |       |                    |                          |
| <b>2(3H)-Furanone, dihydro-5-methyl-</b>    | esters           | B9        | more_than_6 | VOCs  | P5 | 0.96  | 2.7214  |              |       |                    |                          |
| <b>2(5H)-Furanone, 5,5-dimethyl-</b>        | esters           | B9        | more_than_6 | VOCs  | P4 | 0.96  | 2.7214  |              |       |                    |                          |
| <b>2(5H)-Furanone, 3-methyl-</b>            | esters           | B9        | more_than_6 | VOCs  | P5 | 0.96  | 12.2364 |              |       |                    |                          |
| <b>Methyl 2-furoate</b>                     | esters           | B10       | more_than_6 | VOCs  | P3 |       |         |              |       |                    |                          |
| <b>4-Methyl-5H-furan-2-one</b>              | esters           | B10       | more_than_6 | VOCs  | P5 |       |         |              |       |                    |                          |
| <b>2-Furanone, 2,5-dihydro-3,5-dimethyl</b> | esters           | B10       | more_than_6 | VOCs  | P4 |       |         |              |       |                    |                          |
| <b>2-Hydroxy-gamma-butyrolactone</b>        | esters           | B10       | more_than_6 | VOCs  | P5 |       |         |              |       |                    |                          |
| <b>Benzofuran</b>                           | esters           | B10       | more_than_6 | VOCs  | P3 |       |         |              |       |                    |                          |
| <b>2H-Pyran-2-one, tetrahydro-</b>          | esters           | B10       | more_than_6 | VOCs  | P6 |       |         |              |       |                    |                          |

|                                                              |        |     |             |       |    |      |        |              |
|--------------------------------------------------------------|--------|-----|-------------|-------|----|------|--------|--------------|
| <b>2-Oxepanone</b>                                           | esters | B10 | more_than_6 | VOCs  | P6 |      |        |              |
| <b>2,3-Dimethyl-4-hydroxy-2-butenic lactone</b>              | esters | B10 | more_than_6 | VOCs  | P4 |      |        |              |
| <b>Formic acid, phenylmethyl ester</b>                       | esters | B11 | more_than_6 | VOCs  | P3 |      |        |              |
| <b>Benzoic acid, methyl ester</b>                            | esters | B11 | more_than_6 | VOCs  | P3 |      | 0.844  | AopWin v1.92 |
| <b>Pentanedioic acid, dimethyl ester</b>                     | esters | B11 | more_than_6 | VOCs  | P3 | 0.42 | 2.5605 | AopWin       |
| <b>Acetic acid, phenylmethyl ester</b>                       | esters | B11 | more_than_6 | VOCs  | P3 |      |        |              |
| <b>Benzoic acid, ethyl ester</b>                             | esters | B11 | more_than_6 | VOCs  | P3 |      | 0.844  |              |
| <b>Hexanedioic acid, dimethyl ester</b>                      | esters | B12 | 6           | IVOCs | P3 | 1.8  | 3.9736 | AopWin       |
| <b>Acetic acid, 2-phenylethyl ester</b>                      | esters | B12 | 6           | IVOCs | P3 |      |        |              |
| <b>Linalyl acetate</b>                                       | esters | B12 | 6           | IVOCs | P2 |      |        |              |
| <b>n-Butyric acid 2-ethylhexyl ester</b>                     | esters | B13 | 6           | IVOCs | P2 |      |        |              |
| <b>Cyclohexanol, 4-(1,1-dimethylethyl)-, acetate, trans-</b> | esters | B13 | 6           | IVOCs | P2 |      |        |              |
| <b><math>\alpha</math>-Terpinyl acetate</b>                  | esters | B13 | 6           | IVOCs | P2 |      |        |              |
| <b>Cyclohexanol, 4-(1,1-dimethylethyl)-, acetate, cis-</b>   | esters | B14 | 6           | IVOCs | P2 |      |        |              |
| <b>Pentanoic acid, 2-ethylhexyl ester</b>                    | esters | B14 | 6           | IVOCs | P2 |      |        |              |
| <b>Verdyl acetate</b>                                        | esters | B14 | 6           | IVOCs | P3 |      |        |              |
| <b>1,6-Dioxacyclododecane-7,12-dione</b>                     | esters | B15 | 5           | IVOCs | P4 |      |        |              |
| <b>Benzoic acid, hept-3-yl ester</b>                         | esters | B15 | 5           | IVOCs | P3 |      |        |              |



|                                                                                            |        |           |             |       |    |      |         |              |      |                                           |
|--------------------------------------------------------------------------------------------|--------|-----------|-------------|-------|----|------|---------|--------------|------|-------------------------------------------|
| <b>2,2,4-Trimethyl-1,3-pentanediol diisobutyrate</b>                                       | esters | B16       | 5           | IVOCs | P2 | 0.38 | 11.4614 | AopWin       |      |                                           |
| <b>n-Hexyl salicylate</b>                                                                  | esters | B17       | 4           | IVOCs | P2 |      |         |              |      |                                           |
| <b>Benzoic acid, 2-ethylhexyl ester</b>                                                    | esters | B17       | 4           | IVOCs | P2 | 0.98 | 11.5368 | AopWin       |      |                                           |
| <b>1,4-Dioxin, 2,3-dihydro-Anisole</b>                                                     | ethers | B8_before | more_than_6 | VOCs  | P2 |      |         |              |      |                                           |
|                                                                                            | ethers | B9        | more_than_6 | VOCs  | P3 | 6.66 | 22.3336 | AopWin       |      |                                           |
| <b>Oxepine, 2,7-dimethyl-Furan, 2-butyltetrahydro-</b>                                     | ethers | B9        | more_than_6 | VOCs  | P2 |      |         |              |      |                                           |
|                                                                                            | ethers | B10       | more_than_6 | VOCs  | P3 | 2.13 | 23.5632 | AopWin       |      |                                           |
| <b>(2R,5R)-2-Methyl-5-(prop-1-en-2-yl)-2-vinyltetrahydrofuran</b>                          | ethers | B10       | more_than_6 | VOCs  | P2 |      |         |              |      |                                           |
| <b>Benzene, 1-methoxy-4-methyl-Benzofuran, 2-methyl-</b>                                   | ethers | B10       | more_than_6 | VOCs  | P3 |      |         |              |      |                                           |
|                                                                                            | ethers | B11       | more_than_6 | VOCs  | P3 |      |         |              |      |                                           |
| <b>Benzofuran, 4,7-dimethyl-Ether, <math>\alpha,\alpha</math>-dimethylbenzyl isopropyl</b> | ethers | B12       | 6           | IVOCs | P3 |      |         |              |      |                                           |
|                                                                                            | ethers | B13       | 6           | IVOCs | P3 |      |         |              |      |                                           |
| <b>Benzofuran, 2,3-dihydro-Naphthalene, 2-methoxy-Dibenzofuran</b>                         | ethers | B13       | 6           | IVOCs | P5 |      |         |              |      |                                           |
|                                                                                            | ethers | B14       | 6           | IVOCs | P4 |      |         |              |      |                                           |
|                                                                                            | ethers | B15       | 5           | IVOCs | P4 |      | 7.0302  | AopWin v1.92 |      |                                           |
| <b>Oxacyclotetradeca-4,11-diyne</b>                                                        | ethers | B17       | 4           | IVOCs | P3 |      |         |              |      |                                           |
| <b>Furan, 2,5-dimethyl-2-Vinylfuran</b>                                                    | furans | B8_before | more_than_6 | VOCs  | P5 | 7.88 | 129.881 | AopWin v1.92 | 0.38 | Fang et al., 2017                         |
|                                                                                            | furans | B8_before | more_than_6 | VOCs  | P6 | 7.88 | 129.881 |              | 0.38 | Furan, 2,5-dimethyl-<br>Fang et al., 2017 |
| <b>3,4-Dimethylfuran</b>                                                                   | furans | B8        | more_than_6 | VOCs  | P3 | 9.15 | 129.881 |              | 0.38 | Furan, 2,5-dimethyl-<br>Fang et al., 2017 |
| <b>Furan, 2-ethyl-5-methyl-</b>                                                            | furans | B8        | more_than_6 | VOCs  | P6 | 9.15 | 129.881 |              | 0.38 | Furan, 2,5-dimethyl-<br>Fang et al., 2017 |
| <b>Furan, 2,3,5-trimethyl-</b>                                                             | furans | B8        | more_than_6 | VOCs  | P6 | 9.15 | 129.881 |              | 0.38 | Furan, 2,5-dimethyl-<br>Fang et al., 2017 |

|                                             |         |           |             |      |    |      |          |                          |      |                      |                   |
|---------------------------------------------|---------|-----------|-------------|------|----|------|----------|--------------------------|------|----------------------|-------------------|
| <b>2-Furanmethanol</b>                      | furans  | B8        | more_than_6 | VOCs | P3 | 9.15 | 104.0454 | AopWin                   | 0.38 | Furan, 2,5-dimethyl- | Fang et al., 2017 |
| <b>Ethanone, 1-(2-furanyl)-</b>             | furans  | B9        | more_than_6 | VOCs | P3 |      |          |                          |      |                      |                   |
| <b>2-Butanone, 3-methyl-</b>                | ketones | B8_before | more_than_6 | VOCs | P4 | 1.48 | 2.9      | (Atkinson and Arey,2003) | 0    |                      | Shah et al., 2020 |
| <b>2-Pentanone</b>                          | ketones | B8_before | more_than_6 | VOCs | P6 | 2.81 | 4.4      | (Atkinson and Arey,2003) | 0    |                      | Shah et al., 2020 |
| <b>3-Pentanone</b>                          | ketones | B8_before | more_than_6 | VOCs | P6 | 1.24 | 2        | (Atkinson and Arey,2003) | 0    |                      | Shah et al., 2020 |
| <b>Acetoin</b>                              | ketones | B8_before | more_than_6 | VOCs | P2 |      |          |                          |      |                      |                   |
| <b>3-Penten-2-one, (E)-</b>                 | ketones | B8_before | more_than_6 | VOCs | P2 | 1.24 | 2        |                          |      |                      |                   |
| <b>Propanoic acid, 2-oxo-, methyl ester</b> | ketones | B8        | more_than_6 | VOCs | P4 |      |          |                          |      |                      |                   |
| <b>Cyclopentanone</b>                       | ketones | B8        | more_than_6 | VOCs | P3 | 1.15 | 2.9      | (Atkinson and Arey,2003) |      |                      |                   |
| <b>2-Hexanone</b>                           | ketones | B8        | more_than_6 | VOCs | P2 | 3.14 | 9.1      | (Atkinson and Arey,2003) |      |                      |                   |
| <b>2-Hydroxy-3-pentanone</b>                | ketones | B8        | more_than_6 | VOCs | P3 | 1.24 | 2        |                          |      |                      |                   |
| <b>1-Hydroxy-3-methyl-2-butanone</b>        | ketones | B8        | more_than_6 | VOCs | P3 | 1.48 |          |                          |      |                      |                   |
| <b>2-Cyclopenten-1-one</b>                  | ketones | B8        | more_than_6 | VOCs | P4 |      |          |                          |      |                      |                   |
| <b>2-Pentanone, 3-ethyl-</b>                | ketones | B8        | more_than_6 | VOCs | P4 | 1.24 | 2        |                          |      |                      |                   |
| <b>3-Hexen-2-one</b>                        | ketones | B8        | more_than_6 | VOCs | P2 | 3.14 | 9.1      |                          |      |                      |                   |
| <b>4-Hexen-3-one</b>                        | ketones | B8        | more_than_6 | VOCs | P3 | 3.14 | 9.1      |                          |      |                      |                   |
| <b>2-Propanone, 1-(acetyloxy)-</b>          | ketones | B8        | more_than_6 | VOCs | P4 |      |          |                          |      |                      |                   |
| <b>4-Cyclopentene-1,3-dione</b>             | ketones | B8        | more_than_6 | VOCs | P5 |      |          |                          |      |                      |                   |
| <b>Cyclopentanone, 2-methyl-</b>            | ketones | B9        | more_than_6 | VOCs | P4 | 1.24 |          |                          |      |                      |                   |
| <b>Cyclopentanone, 3-methyl-</b>            | ketones | B9        | more_than_6 | VOCs | P4 | 1.35 |          |                          |      |                      |                   |
| <b>2-Cyclopenten-1-one, 2-methyl-</b>       | ketones | B9        | more_than_6 | VOCs | P3 |      |          |                          |      |                      |                   |
| <b>3-Penten-2-one, 3,4-dimethyl-</b>        | ketones | B9        | more_than_6 | VOCs | P3 | 1.24 |          |                          |      |                      |                   |
| <b>2-Acetyl-2-methyltetrahydrofuran</b>     | ketones | B9        | more_than_6 | VOCs | P3 |      |          |                          |      |                      |                   |

|                                                   |         |     |             |       |    |      |        |                          |
|---------------------------------------------------|---------|-----|-------------|-------|----|------|--------|--------------------------|
| <b>2-Cyclopenten-1-one, 2,3-dimethyl-</b>         | ketones | B9  | more_than_6 | VOCs  | P3 | 1.24 |        |                          |
| <b>3-Hepten-2-one</b>                             | ketones | B9  | more_than_6 | VOCs  | P3 | 3.14 | 9.1    |                          |
| <b>3-Methyl-3-cyclohexen-1-one</b>                | ketones | B9  | more_than_6 | VOCs  | P4 |      |        |                          |
| <b>2-Butanone, 1-(acetyloxy)-</b>                 | ketones | B9  | more_than_6 | VOCs  | P3 | 1.48 |        |                          |
| <b>2-Cyclopenten-1-one, 3-methyl-</b>             | ketones | B9  | more_than_6 | VOCs  | P4 |      |        |                          |
| <b>5-Hepten-2-one, 6-methyl-</b>                  | ketones | B10 | more_than_6 | VOCs  | P2 |      |        |                          |
| <b>2-Cyclopenten-1-one, 3,4-dimethyl-</b>         | ketones | B9  | more_than_6 | VOCs  | P3 |      |        |                          |
| <b>1,4-Cyclohex-2-enedione</b>                    | ketones | B10 | more_than_6 | VOCs  | P4 |      | 6.4    |                          |
| <b>1,2-Cyclopentanedione, 3-methyl-</b>           | ketones | B10 | more_than_6 | VOCs  | P3 |      |        |                          |
| <b>1,3-Cyclohexanedione, 2-methyl-</b>            | ketones | B10 | more_than_6 | VOCs  | P4 | 1.35 | 6.4    |                          |
| <b>1-(1,2-Dimethyl-cyclopent-2-enyl)-ethanone</b> | ketones | B10 | more_than_6 | VOCs  | P4 |      |        |                          |
| <b>2-Cyclopenten-1-one, 2,3,4-trimethyl-</b>      | ketones | B10 | more_than_6 | VOCs  | P3 |      |        |                          |
| <b>Cyclohexanone, 3-ethenyl-</b>                  | ketones | B10 | more_than_6 | VOCs  | P4 | 1.35 |        |                          |
| <b>Acetophenone</b>                               | ketones | B10 | more_than_6 | VOCs  | P3 |      | 1.8795 | AopWin v1.92             |
| <b>Levogluosenone</b>                             | ketones | B11 | more_than_6 | VOCs  | P5 |      |        |                          |
| <b>Isophorone</b>                                 | ketones | B11 | more_than_6 | VOCs  | P3 | 4.63 | 80.691 | AopWin v1.92             |
| <b>Camphor</b>                                    | ketones | B11 | more_than_6 | VOCs  | P3 | 0.49 | 4.3    | (Atkinson and Arey,2003) |
| <b>Cyclohexanone, 4-acetyl-</b>                   | ketones | B12 | 6           | IVOCs | P5 |      | 6.4    |                          |
| <b>1,2-Naphthalenedione</b>                       | ketones | B12 | 6           | IVOCs | P4 |      |        |                          |
| <b>1H-Inden-1-one, 2,3-dihydro-</b>               | ketones | B13 | 6           | IVOCs | P4 |      |        |                          |
| <b>1H-Inden-1-one, 2,3-dihydro-2-methyl-</b>      | ketones | B13 | 6           | IVOCs | P4 |      |        |                          |

|                                                                  |           |     |             |       |    |        |              |                            |       |                   |
|------------------------------------------------------------------|-----------|-----|-------------|-------|----|--------|--------------|----------------------------|-------|-------------------|
| <b>1-Methylindan-2-one</b>                                       | ketones   | B13 | 6           | IVOCs | P4 |        |              |                            |       |                   |
| <b>2,3,6-Trimethylacetophenone</b>                               | ketones   | B13 | 6           | IVOCs | P3 |        |              |                            |       |                   |
| <b>Ethanone, 1-(2,4,6-trimethylphenyl)-</b>                      | ketones   | B13 | 6           | IVOCs | P3 |        |              |                            |       |                   |
| <b>5,9-Undecadien-2-one, 6,10-dimethyl-</b>                      | ketones   | B14 | 6           | IVOCs | P2 |        |              |                            |       |                   |
| <b>2,5-Cyclohexadiene-1,4-dione, 2,6-bis(1,1-dimethylethyl)-</b> | ketones   | B15 | 5           | IVOCs | P2 |        |              |                            |       |                   |
| <b>Benzophenone</b>                                              | ketones   | B16 | 5           | IVOCs | P4 | 3.5549 | AopWin v1.92 |                            |       |                   |
| <b>Ethanone, 1,2-diphenyl-</b>                                   | ketones   | B17 | 4           | IVOCs | P5 | 7.323  | AopWin v1.92 |                            |       |                   |
| <b>C8</b>                                                        | n-alkanes | B8  | more_than_6 | VOCs  | P1 | 0.9    | 8.11         | (Atkinson and Arey,2003)   | 0.058 | Wu et al., 2017   |
| <b>C9</b>                                                        | n-alkanes | B9  | more_than_6 | VOCs  | P1 | 0.78   | 9.7          | (Atkinson and Arey,2003)   | 0.14  | Wu et al., 2017   |
| <b>C10</b>                                                       | n-alkanes | B10 | more_than_6 | VOCs  | P1 | 0.68   | 11           | (Atkinson and Arey,2003)   | 0.22  | Wu et al., 2017   |
| <b>C11</b>                                                       | n-alkanes | B11 | more_than_6 | VOCs  | P1 | 0.61   | 12.3         | (Atkinson and Arey,2003)   | 0.33  | Wu et al., 2017   |
| <b>C12</b>                                                       | n-alkanes | B12 | 6           | IVOCs | P1 | 0.55   | 13.2         | (Atkinson and Arey,2003)   | 0.02  | Chan et al., 2009 |
| <b>C13</b>                                                       | n-alkanes | B13 | 6           | IVOCs | P1 | 0.53   | 15.1         | (Atkinson and Arey,2003)   | 0.03  | Chan et al., 2009 |
| <b>C14</b>                                                       | n-alkanes | B14 | 6           | IVOCs | P1 | 0.51   | 17.9         | (Atkinson and Arey,2003)   | 0.05  | Chan et al., 2009 |
| <b>C15</b>                                                       | n-alkanes | B15 | 5           | IVOCs | P1 | 0.5    | 20.7         | (Atkinson and Arey,2003)   | 0.08  | Chan et al., 2009 |
| <b>C16</b>                                                       | n-alkanes | B16 | 5           | IVOCs | P1 | 0.45   | 23.2         | (Atkinson and Arey,2003)   | 0.12  | Chan et al., 2009 |
| <b>C17</b>                                                       | n-alkanes | B17 | 4           | IVOCs | P1 | 0.42   | 28.5         | (A. W. H. Chan et al,2009) | 0.2   | Chan et al., 2009 |
| <b>C18</b>                                                       | n-alkanes | B18 | 4           | IVOCs | P1 | 0.4    | 35.1         | (A. W. H. Chan et al,2009) | 0.3   | Chan et al., 2009 |
| <b>C19</b>                                                       | n-alkanes | B19 | 4           | IVOCs | P1 | 0.38   | 43.2         | (A. W. H. Chan et al,2009) | 0.42  | Chan et al., 2009 |
| <b>C20</b>                                                       | n-alkanes | B20 | 3           | IVOCs | P2 | 0.36   | 53.1         | (A. W. H. Chan et al,2009) | 0.56  | Chan et al., 2009 |
| <b>C21</b>                                                       | n-alkanes | B21 | 3           | IVOCs | P2 | 0.34   | 26.654       | AopWin v1.92               | 0.77  | Gentner, 2012     |
| <b>C22</b>                                                       | n-alkanes | B22 | 3           | IVOCs | P2 | 0.33   | 28.0671      | AopWin v1.92               | 0.96  | Gentner, 2012     |
| <b>C23</b>                                                       | n-alkanes | B23 | 2           | SVOCs | P2 |        | 29.4801      | AopWin v1.92               | 1.08  | Gentner, 2012     |
| <b>C24</b>                                                       | n-alkanes | B24 | 2           | SVOCs | P2 |        | 30.8932      | AopWin v1.92               | 1.14  | Gentner, 2012     |
| <b>C25</b>                                                       | n-alkanes | B25 | 2           | SVOCs | P2 |        | 32.3062      | AopWin v1.92               | 1.16  | Gentner, 2012     |

|                                     |                                      |           |             |      |    |        |        |
|-------------------------------------|--------------------------------------|-----------|-------------|------|----|--------|--------|
| <b>2-Furancarbonitrile</b>          | nitriles                             | B8        | more_than_6 | VOCs | P3 |        |        |
| <b>Isoamyl cyanide</b>              | nitriles                             | B8        | more_than_6 | VOCs | P3 |        |        |
| <b>Benzonitrile</b>                 | nitriles                             | B10       | more_than_6 | VOCs | P4 | 0.3443 | AopWin |
| <b>4-Methyl-2-oxopentanenitrile</b> | nitriles                             | B11       | more_than_6 | VOCs | P6 |        |        |
| <b>Pyrazine</b>                     | nitrogen-<br>containing<br>compounds | B8_before | more_than_6 | VOCs | P3 |        |        |
| <b>1H-Pyrazole, 1-methyl-</b>       | nitrogen-<br>containing<br>compounds | B8_before | more_than_6 | VOCs | P2 |        |        |
| <b>Pyrrole</b>                      | nitrogen-<br>containing<br>compounds | B8_before | more_than_6 | VOCs | P3 |        |        |
| <b>Pyridine</b>                     | nitrogen-<br>containing<br>compounds | B8_before | more_than_6 | VOCs | P3 |        |        |
| <b>Pyrazine, methyl-</b>            | nitrogen-<br>containing<br>compounds | B8        | more_than_6 | VOCs | P3 |        |        |
| <b>N,N-Dimethylacetamide</b>        | nitrogen-<br>containing<br>compounds | B8        | more_than_6 | VOCs | P4 |        |        |
| <b>Pyrimidine, 4-methyl-</b>        | nitrogen-<br>containing<br>compounds | B9        | more_than_6 | VOCs | P3 |        |        |
| <b>Imidazole, 1,4,5-trimethyl-</b>  | nitrogen-<br>containing<br>compounds | B9        | more_than_6 | VOCs | P3 |        |        |

---

|                                                                    |                                      |     |             |      |    |
|--------------------------------------------------------------------|--------------------------------------|-----|-------------|------|----|
| <b>Pyrazine, methoxy-</b>                                          | nitrogen-<br>containing<br>compounds | B9  | more_than_6 | VOCs | P3 |
| <b>Propanamide, N-ethyl-</b>                                       | nitrogen-<br>containing<br>compounds | B9  | more_than_6 | VOCs | P3 |
| <b>4(1H)-Pyrimidinone, 6-methyl-</b>                               | nitrogen-<br>containing<br>compounds | B9  | more_than_6 | VOCs | P5 |
| <b>1H-Pyrazole, 3-methyl-</b>                                      | nitrogen-<br>containing<br>compounds | B10 | more_than_6 | VOCs | P4 |
| <b>4-Cyanocyclohexene</b>                                          | nitrogen-<br>containing<br>compounds | B10 | more_than_6 | VOCs | P4 |
| <b><math>\alpha</math>-Amino-<math>\gamma</math>-butyrolactone</b> | nitrogen-<br>containing<br>compounds | B11 | more_than_6 | VOCs | P5 |
| <b>Piperidine, 1-nitroso-</b>                                      | nitrogen-<br>containing<br>compounds | B11 | more_than_6 | VOCs | P7 |
| <b>Pyrrolidine, 1-acetyl-</b>                                      | nitrogen-<br>containing<br>compounds | B11 | more_than_6 | VOCs | P4 |
| <b>Benzenamine, 2-ethyl-6-methyl-</b>                              | nitrogen-<br>containing<br>compounds | B11 | more_than_6 | VOCs | P3 |

---

|                                                           |                                      |     |   |       |    |      |        |        |
|-----------------------------------------------------------|--------------------------------------|-----|---|-------|----|------|--------|--------|
| <b>Formamide, N-cyclohexyl-</b>                           | nitrogen-<br>containing<br>compounds | B12 | 6 | IVOCs | P4 |      |        |        |
| <b>Caprolactam</b>                                        | nitrogen-<br>containing<br>compounds | B12 | 6 | IVOCs | P5 |      |        |        |
| <b>2-Butyn-1-one, 1-(5-methyl-1H-1,2,3-triazol-4-yl)-</b> | nitrogen-<br>containing<br>compounds | B12 | 6 | IVOCs | P3 |      |        |        |
| <b>1H-Pyrrole, 1-phenyl-</b>                              | nitrogen-<br>containing<br>compounds | B13 | 6 | IVOCs | P3 |      |        |        |
| <b>Acetamide, N-methyl-N-phenyl-</b>                      | nitrogen-<br>containing<br>compounds | B13 | 6 | IVOCs | P4 |      |        |        |
| <b>Hept-2-enoylamide, N-methyl-</b>                       | nitrogen-<br>containing<br>compounds | B13 | 6 | IVOCs | P5 |      |        |        |
| <b>Quinoline, 1,2-dihydro-2,2,4-trimethyl-</b>            | nitrogen-<br>containing<br>compounds | B14 | 6 | IVOCs | P3 |      |        |        |
| <b>Quinoline, 2,4-dimethyl-</b>                           | nitrogen-<br>containing<br>compounds | B14 | 6 | IVOCs | P4 |      |        |        |
| <b>2-Benzothiazolamine, N-ethyl-</b>                      | nitrogen-<br>containing<br>compounds | B17 | 4 | IVOCs | P5 |      |        |        |
| <b>Diethyl Phthalate</b>                                  | PAEs                                 | B16 | 5 | IVOCs | P4 | 1.62 | 3.4658 | AopWin |

|                                                                |         |     |             |       |    |      |         |                                 |      |                                        |
|----------------------------------------------------------------|---------|-----|-------------|-------|----|------|---------|---------------------------------|------|----------------------------------------|
| <b>1,2-Benzenedicarboxylic acid, bis(2-methylpropyl) ester</b> | PAEs    | B18 | 4           | IVOCs | P3 |      | 9.2602  | AopWin v1.92                    |      |                                        |
| <b>Dibutyl phthalate</b>                                       | PAEs    | B19 | 4           | IVOCs | P3 | 1.25 | 9.277   | AopWin v1.92                    |      |                                        |
| <b>Naphthalene</b>                                             | PAHs    | B12 | 6           | IVOCs | P3 | 3.34 | 23      | (Atkinson and Arey,2003)        | 0.26 | Chan et al., 2009                      |
| <b>Naphthalene, 2-methyl-</b>                                  | PAHs    | B13 | 6           | IVOCs | P3 | 3.06 | 48.6    | (Phouongphouang and Arey, 2002) | 0.38 | Chan et al., 2009                      |
| <b>Naphthalene, 1-methyl-</b>                                  | PAHs    | B13 | 6           | IVOCs | P3 | 3.06 | 40.9    | (Phouongphouang and Arey, 2002) | 0.33 | Chan et al., 2009                      |
| <b>Naphthalene-C2</b>                                          | PAHs    | B14 | 6           | IVOCs | P3 | 3.06 | 40.2    | (Phouongphouang and Arey, 2002) | 0.28 | Gentner, 2012                          |
| <b>Acenaphthylene</b>                                          | PAHs    | B14 | 6           | IVOCs | P4 | 3.06 | 75.4921 | AopWin v1.92                    | 0.03 | Fang et al., 2017                      |
| <b>Phenol</b>                                                  | phenols | B10 | more_than_6 | VOCs  | P3 | 2.76 | 33.4673 | AopWin v1.92                    | 0.38 | Fang et al., 2017                      |
| <b>Phenol, 2-methyl-</b>                                       | phenols | B11 | more_than_6 | VOCs  | P3 | 2.4  | 41.13   | AopWin v1.92                    | 0.38 | Fang et al., 2017                      |
| <b>Phenol, 2-methoxy-</b>                                      | phenols | B11 | more_than_6 | VOCs  | P3 | 2.4  | 29.798  | AopWin v1.92                    | 0.4  | Fang et al., 2017                      |
| <b>Creosol</b>                                                 | phenols | B12 | 6           | IVOCs | P3 | 2.4  | 23.2235 |                                 | 0.38 | Phenol, 3-methyl-<br>Fang et al., 2017 |
| <b>Phenol, 4-ethyl-2-methoxy-</b>                              | phenols | B13 | 6           | IVOCs | P3 | 2.4  | 23.2235 |                                 | 0.38 | Phenol, 3-methyl-<br>Fang et al., 2017 |
| <b>Hydroquinone</b>                                            | phenols | B13 | 6           | IVOCs | P4 | 2.4  | 23.2235 | AopWin                          | 0.38 | Phenol, 3-methyl-<br>Fang et al., 2017 |
| <b>Propofol</b>                                                | phenols | B13 | 6           | IVOCs | P3 | 2.4  | 23.2235 |                                 | 0.38 | Phenol, 3-methyl-<br>Fang et al., 2017 |
| <b>Phenol, 2,6-dimethoxy-</b>                                  | phenols | B13 | 6           | IVOCs | P4 | 2.4  | 23.2235 |                                 | 0.38 | Phenol, 3-methyl-<br>Fang et al., 2017 |
| <b>Phenol, 2,6-bis(1,1-dimethylethyl)-4-(1-methylpropyl)-</b>  | phenols | B16 | 5           | IVOCs | P2 | 1.18 | 18.2887 |                                 | 0.38 | Phenol, 3-methyl-<br>Fang et al., 2017 |



|                                                                             |                  |     |             |       |    |      |         |                      |       |                   |                       |
|-----------------------------------------------------------------------------|------------------|-----|-------------|-------|----|------|---------|----------------------|-------|-------------------|-----------------------|
| <b>Ethanone, 1-(7-hydroxy-5-methoxy-2,2-dimethyl-2H-1-benzopyran-8-yl)-</b> | phenols          | B19 | 4           | IVOCs | P3 | 1.18 | 18.2887 |                      | 0.38  | Phenol, 3-methyl- | Fang et al., 2017     |
| <b>D3</b>                                                                   | siloxanes        | B8  | more_than_6 | VOCs  | P3 |      | 0.86    | (Alton et al., 2020) | 0.095 |                   | McDonald et al., 2018 |
| <b>D4</b>                                                                   | siloxanes        | B10 | more_than_6 | VOCs  | P1 |      | 1.3     | (Alton et al., 2020) | 0.095 |                   | McDonald et al., 2018 |
| <b>L4</b>                                                                   | siloxanes        | B11 | more_than_6 | VOCs  | P1 |      | 1.496   | AopWin v1.92         | 0.095 |                   | McDonald et al., 2018 |
| <b>D5</b>                                                                   | siloxanes        | B12 | 6           | IVOCs | P1 |      | 2.1     | (Alton et al., 2020) | 0.095 |                   | McDonald et al., 2018 |
| <b>L5</b>                                                                   | siloxanes        | B13 | 6           | IVOCs | P1 |      | 1.7952  | AopWin v1.92         | 0.095 |                   |                       |
| <b>D6</b>                                                                   | siloxanes        | B13 | 6           | IVOCs | P1 |      | 1.7952  | AopWin v1.92         | 0.095 |                   | McDonald et al., 2018 |
| <b>D7</b>                                                                   | siloxanes        | B15 | 5           | IVOCs | P1 |      | 1.7952  |                      |       |                   |                       |
| <b>D8</b>                                                                   | siloxanes        | B17 | 4           | IVOCs | P1 |      | 1.7952  |                      |       |                   |                       |
| <b>Benzothiazole</b>                                                        | sulfur compounds | B12 | 6           | IVOCs | P4 |      |         |                      |       |                   |                       |
| <b>Cyclohexane, isothiocyanato-</b>                                         | sulfur compounds | B12 | 6           | IVOCs | P3 |      |         |                      |       |                   |                       |
| <b>B15_cyclic_UCM</b>                                                       | UCMs             | B15 | 5           | IVOCs | P2 | 0.47 | 21.8828 |                      | 0.613 |                   | Lim and Ziemann, 2009 |
| <b>B15_aliphatic_UCM</b>                                                    | UCMs             | B15 | 5           | IVOCs | P2 | 0.5  | 20.7    |                      | 0.08  | C15               | Chan et al., 2009     |
| <b>B16_cyclic_UCM</b>                                                       | UCMs             | B16 | 5           | IVOCs | P3 | 0.47 | 21.8828 |                      | 0.613 |                   | Lim and Ziemann, 2009 |
| <b>B17_cyclic_UCM</b>                                                       | UCMs             | B17 | 4           | IVOCs | P2 | 0.43 | 23.2958 |                      | 0.613 |                   | Lim and Ziemann, 2009 |

---

|                           |      |     |   |       |    |      |         |  |       |                          |
|---------------------------|------|-----|---|-------|----|------|---------|--|-------|--------------------------|
| <b>B18_cyclic_UCM</b>     | UCMs | B18 | 4 | IVOCs | P2 | 0.43 | 23.2958 |  | 0.613 | Lim and Ziemann, 2009    |
| <b>B20_aliphatic_UCM</b>  | UCMs | B20 | 3 | IVOCs | P1 | 0.36 | 53.1    |  | 0.56  | C20<br>Chan et al., 2009 |
| <b>B20_oxygenated_UCM</b> | UCMs | B20 | 3 | IVOCs | P2 |      |         |  |       |                          |
| <b>B20_cyclic_UCM</b>     | UCMs | B20 | 3 | IVOCs | P3 | 0.43 | 23.2958 |  | 0.613 | Lim and Ziemann, 2009    |
| <b>B21_cyclic_UCM</b>     | UCMs | B21 | 3 | IVOCs | P3 | 0.43 | 23.2958 |  | 0.613 | Lim and Ziemann, 2009    |

---

26

27

28 **Table S4.** Emission factors ( $\mu\text{g g}^{-1}$ ) of selected compounds in this study and comparison with other  
 29 incense burning studies.

| Rank of<br>EF | Compound                             | This study      | Lee et al., 2004<br>(Lee and Wang, 2004) | Yang et al., 2007<br>(Yang et al., 2007) | Manoukian et al., 2016<br>(Manoukian et al., 2016) |
|---------------|--------------------------------------|-----------------|------------------------------------------|------------------------------------------|----------------------------------------------------|
| 1             | Toluene                              | $70.8 \pm 35.7$ | $150.7 \pm 34.3$                         | 108 ~ 661                                | 366 ~ 1194                                         |
| 2             | Benzene                              | $59.6 \pm 43.1$ | $491.1 \pm 50.6$                         | 188 ~ 1796                               | 654 ~ 1826                                         |
| 3             | Furfural                             | $28.8 \pm 10.4$ |                                          |                                          |                                                    |
| 4             | Phenol                               | $24.0 \pm 13.3$ |                                          |                                          |                                                    |
| 5             | Styrene                              | $21.9 \pm 11.1$ | $53.3 \pm 22.0$                          | 13 ~ 73                                  |                                                    |
| 6             | Propanoic acid, 2-oxo-, methyl ester | $21.0 \pm 9.5$  |                                          |                                          |                                                    |
| 7             | 2-Butanone, 3-methyl-                | $18.7 \pm 14.0$ |                                          |                                          |                                                    |
| 8             | Ethylbenzene                         | $15.5 \pm 8.9$  | $9.9 \pm 2.0$                            | 2 ~ 165                                  |                                                    |
| 9             | 2-Propanone, 1-hydroxy-              | $13.9 \pm 7.3$  |                                          |                                          |                                                    |
| 10            | Benzyl alcohol                       | $13.4 \pm 19.2$ |                                          |                                          |                                                    |
| 11            | <i>p</i> -Xylene                     | $12.1 \pm 5.6$  | $27.5 \pm 6.7$                           | 3 ~ 115                                  |                                                    |
| 18            | Limonene                             | $9.4 \pm 8.5$   |                                          |                                          |                                                    |
| 23            | Phenylethyne                         | $6.8 \pm 3.8$   |                                          |                                          |                                                    |
| 24            | <i>o</i> -Xylene                     | $6.7 \pm 4.0$   | $6.1 \pm 1.4$                            | 1 ~ 133                                  |                                                    |
| 27            | 2-Furanmethanol                      | $5.9 \pm 2.1$   |                                          |                                          |                                                    |
| 36            | 2-Butenal, 2-methyl-                 | $4.9 \pm 3.6$   |                                          |                                          |                                                    |
| 37            | Diethyl Phthalate                    | $4.7 \pm 4.0$   |                                          |                                          |                                                    |
| 39            | Benzaldehyde                         | $4.4 \pm 2.8$   |                                          |                                          |                                                    |
| 40            | Aromandendrene                       | 4.3             |                                          |                                          |                                                    |
| 62            | Naphthalene                          | $3.0 \pm 1.5$   |                                          |                                          |                                                    |
| 65            | Furan, 2,5-dimethyl-                 | $2.9 \pm 0.9$   |                                          |                                          |                                                    |
| 311           | Acenaphthylene                       | $0.1 \pm 0.1$   |                                          |                                          |                                                    |

---

**315**

Dibenzofuran

$0.1 \pm 0.04$

---

30

31 **Figures**

32 **Figure S1.** Incenses used in this study including 4 common incense sticks, 2 Thailand incense sticks,  
33 1 mosquito coil, and 2 incense coils.

34 **Figure S2.** Typical chromatogram of incense burning emissions. Blobs identified are colored by  
35 chemical classes.

36 **Figure S3.** Constitutes of emission factor (EF), ozone formation potential (OFP), and secondary  
37 organic aerosol (SOA) estimation.

38 **Figure S4.** Top 10 chemicals of the incense burning emission factor (EF), ozone formation potential  
39 (OFP), and secondary organic aerosol (SOA) estimation. The unit of EF, OFP, and SOA is  $\mu\text{g g}^{-1}$ .  
40 Compounds are colored by chemical class.

41 **Figure S5.** Volatility-polarity distribution of emission factor (EF), ozone formation potential (OFP),  
42 and secondary organic aerosol (SOA) estimation. VOCs (blue color on the  $x$ -axis), IVOCs (orange  
43 color on the  $x$ -axis), and SVOCs (red color on the  $x$ -axis) are displayed in volatility bins (a decrease  
44 of volatility from B8 to B31) along with their polarity (an increase from P1 to P8 in the  $y$ -axis). The  
45 EF unit is  $\mu\text{g g}^{-1}$ .

46 **Figure S6.** Emission factor (EF), ozone formation potential (OFP), and secondary organic aerosol  
47 (SOA) in both VOC and IVOC ranges. SVOCs are only  $n$ -alkane compounds.

48 **Figure S7.** Pixel-based partial least squares-discriminant analysis (PLS-DA) of incense burning using  
49 different forms of incense. The pre-grouping variable is the incense shape.

50 **Figure S8.** Pixel-based partial least squares-discriminant analysis (PLS-DA) of incense burning made  
51 in different materials. The pre-grouping variable is the incense material.

52 **Figure S9.** Compositions of EFs, OFP, and SOA estimation of different types of incense: incense coil,  
53 incense stick, mosquito coil, and Thailand incense stick.

54 **Figure S10.** Compositions of EFs, OFP, and SOA estimation of different types of incense: aromatic  
55 coil, aromatic stick, mosquito coil, sandalwood stick, and smokeless sandalwood stick.

56 **Figure S11.** Compositions of EFs of different types of incense: incense coil, incense stick, mosquito  
57 coil, and Thailand incense stick.

58 **Figure S12.** Compositions of EFs of different types of incense: aromatic coil, aromatic stick, mosquito

59 coil, sandalwood stick, and smokeless sandalwood stick.

60 **Figure S13.** Relationships of 2-hydroxy-2-cyclopenten-1-one (a), 2-furanmethanol (b), 3-ethyl-2-  
61 pentanone (c), furfural (d) emission factors (EFs) among different incense types.

62 **Figure S14.** The formation mechanism of furfural from xylose and D-xylopyranose.

63 **Figure S15.** Chemicals with high arctic contamination potential (ACP) assessed by pixel-based  
64 approaches.

65

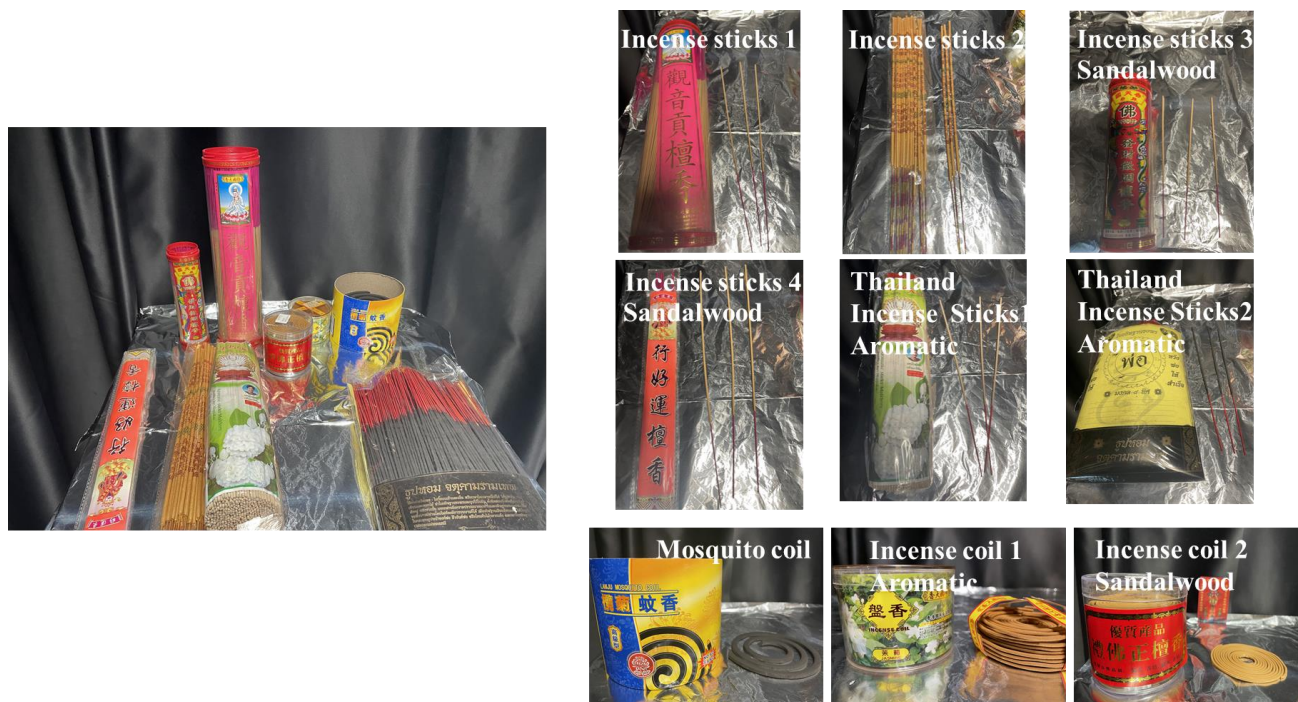

66  
 67 **Figure S1.** Incenses used in this study including 4 common incense sticks, 2 Thailand incense sticks,  
 68 1 mosquito coil, and 2 incense coils.

69

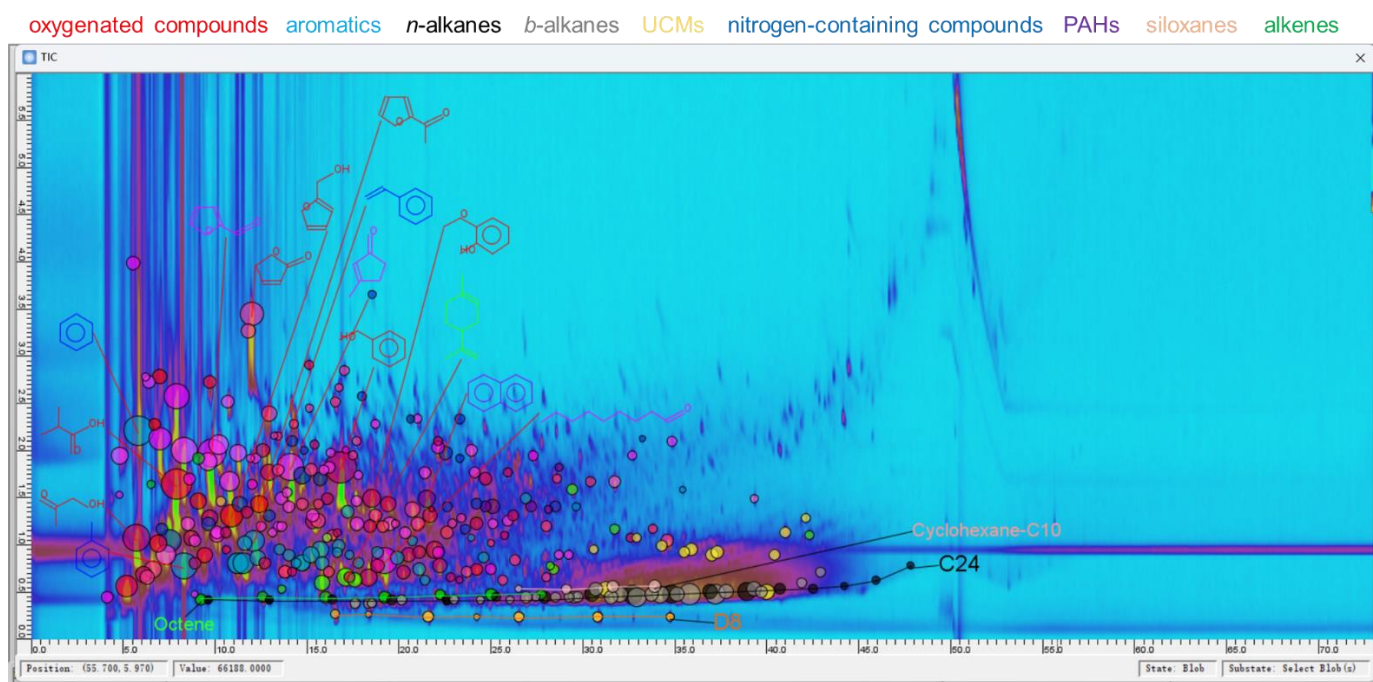

70 oxygenated compounds: ketones alcohols acids aldehydes esters phenols furans ethers  
 71 **Figure S2.** Typical chromatogram of incense burning emissions. Blobs identified are colored by  
 72 chemical classes.

73

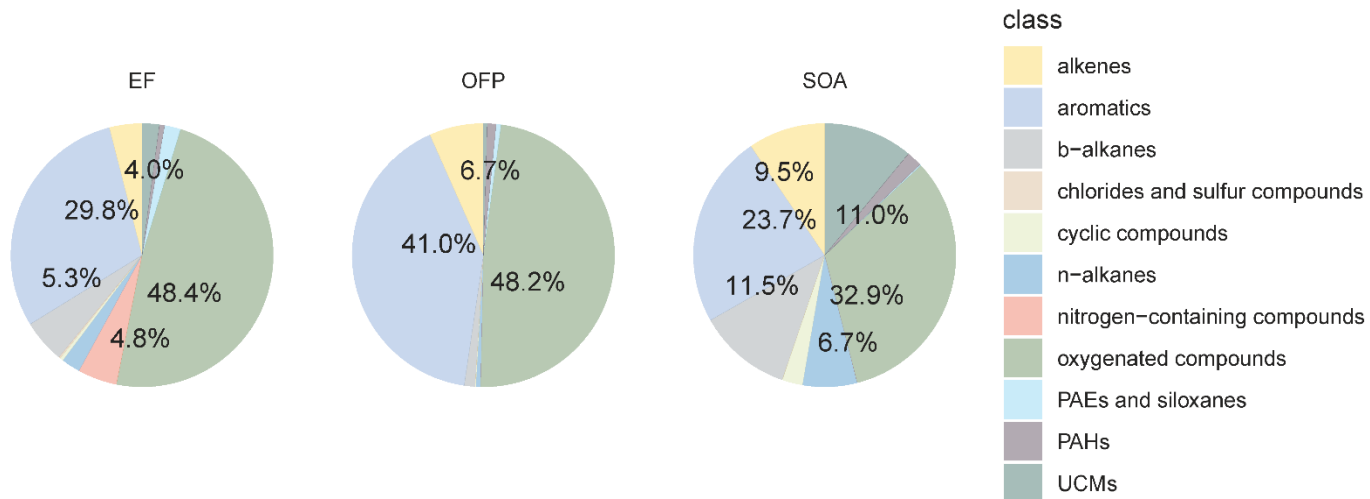

74

75 **Figure S3.** Constitutes of emission factor (EF), ozone formation potential (OFP), and secondary

76 organic aerosol (SOA) estimation.



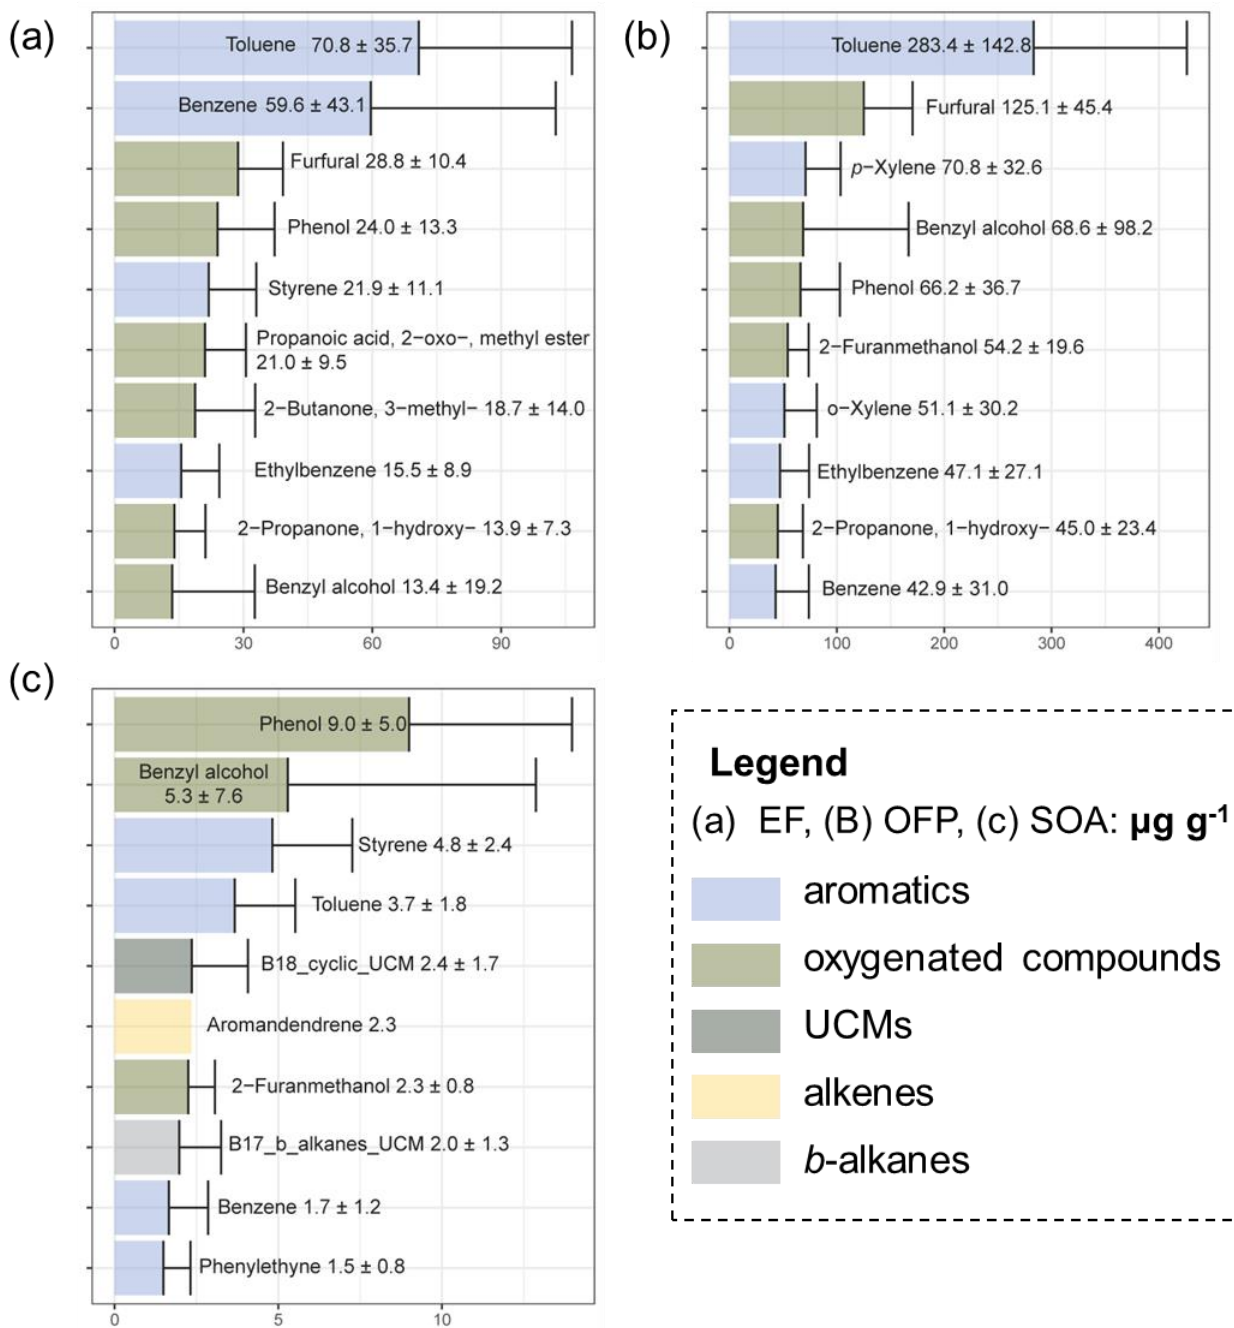

77

78 **Figure S4.** Top 10 chemicals of the incense burning emission factor (EF), ozone formation potential  
 79 (OFP), and secondary organic aerosol (SOA) estimation. The unit of EF, OFP, and SOA is  $\mu\text{g g}^{-1}$ .

80 Compounds are colored by chemical class.

81

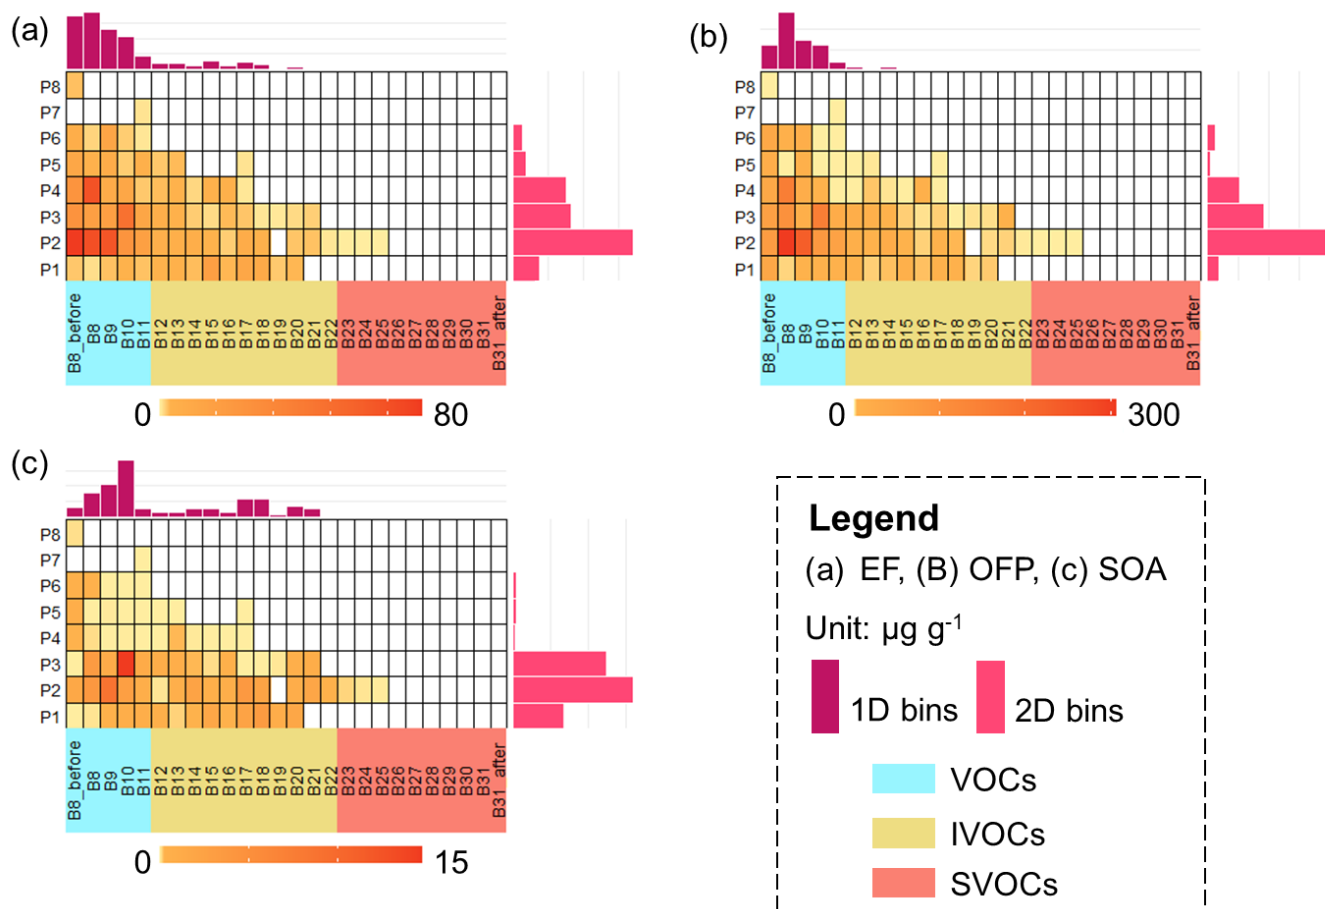

82

83 **Figure S5.** Volatility-polarity distribution of emission factor (EF), ozone formation potential (OFP),  
 84 and secondary organic aerosol (SOA) estimation. VOCs (blue color on the  $x$ -axis), IVOCs (orange  
 85 color on the  $x$ -axis), and SVOCs (red color on the  $x$ -axis) are displayed in volatility bins (a decrease  
 86 of volatility from B8 to B31) along with their polarity (an increase from P1 to P8 in the  $y$ -axis). The  
 87 EF unit is  $\mu\text{g g}^{-1}$ .

88

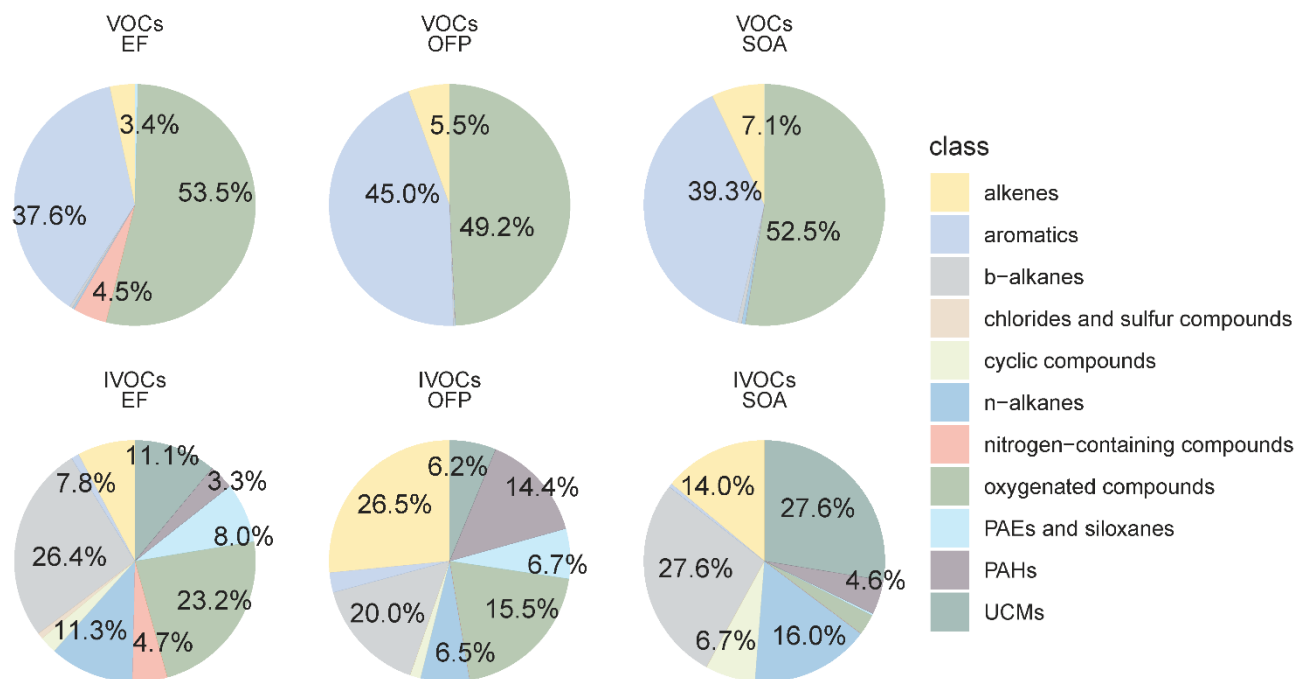

89

90 **Figure S6.** Emission factor (EF), ozone formation potential (OFP), and secondary organic aerosol

91 (SOA) in both VOC and IVOC ranges. SVOCs are only *n*-alkane compounds.

92

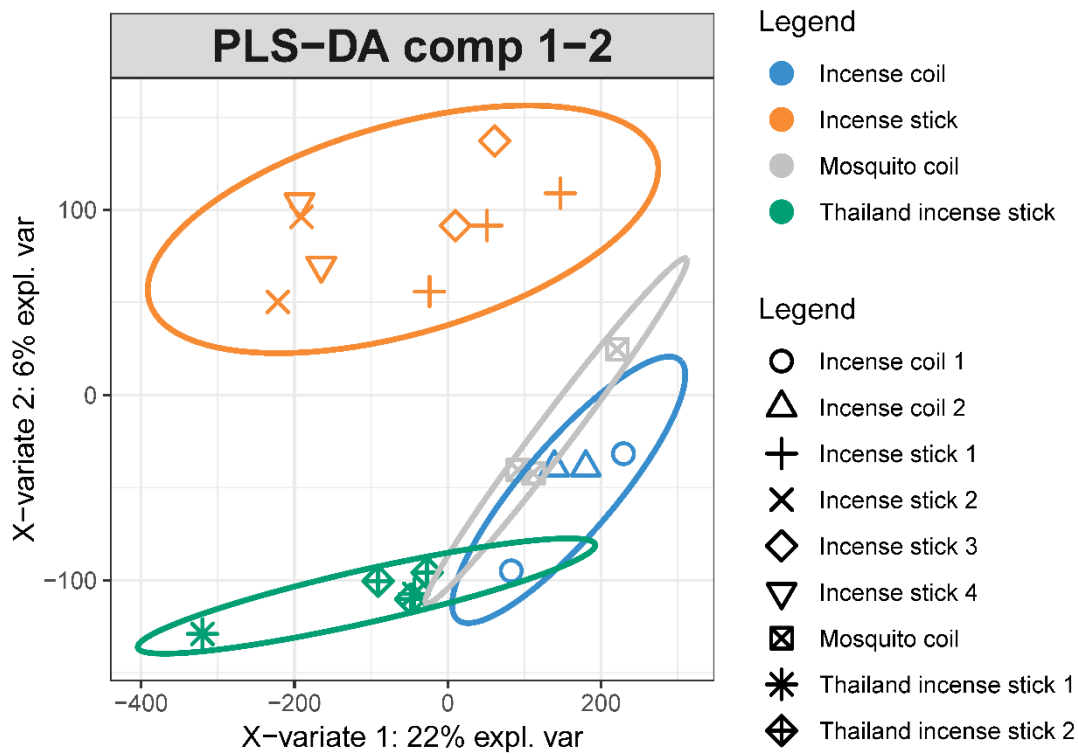

93  
94  
95  
96

**Figure S7.** Pixel-based partial least squares-discriminant analysis (PLS-DA) of incense burning using different forms of incense. The pre-grouping variable is the incense shape.

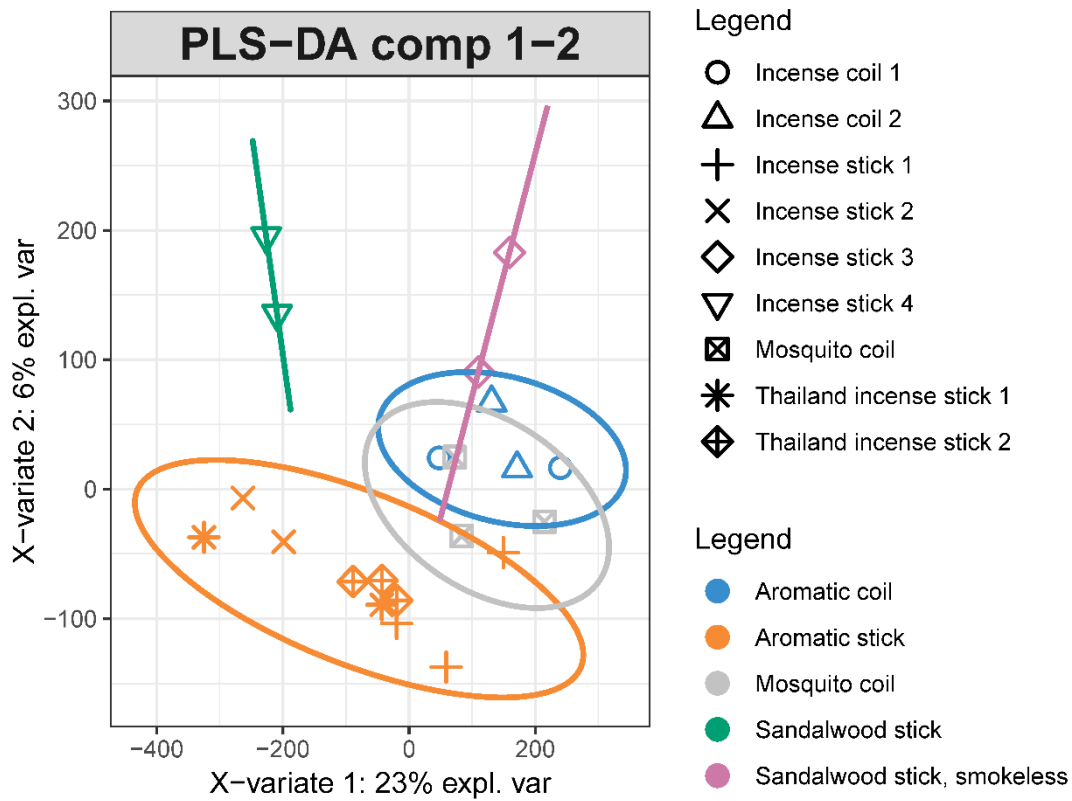

97

98 **Figure S8.** Pixel-based partial least squares-discriminant analysis (PLS-DA) of incense burning made  
 99 in different materials. The pre-grouping variable is the incense material.

100

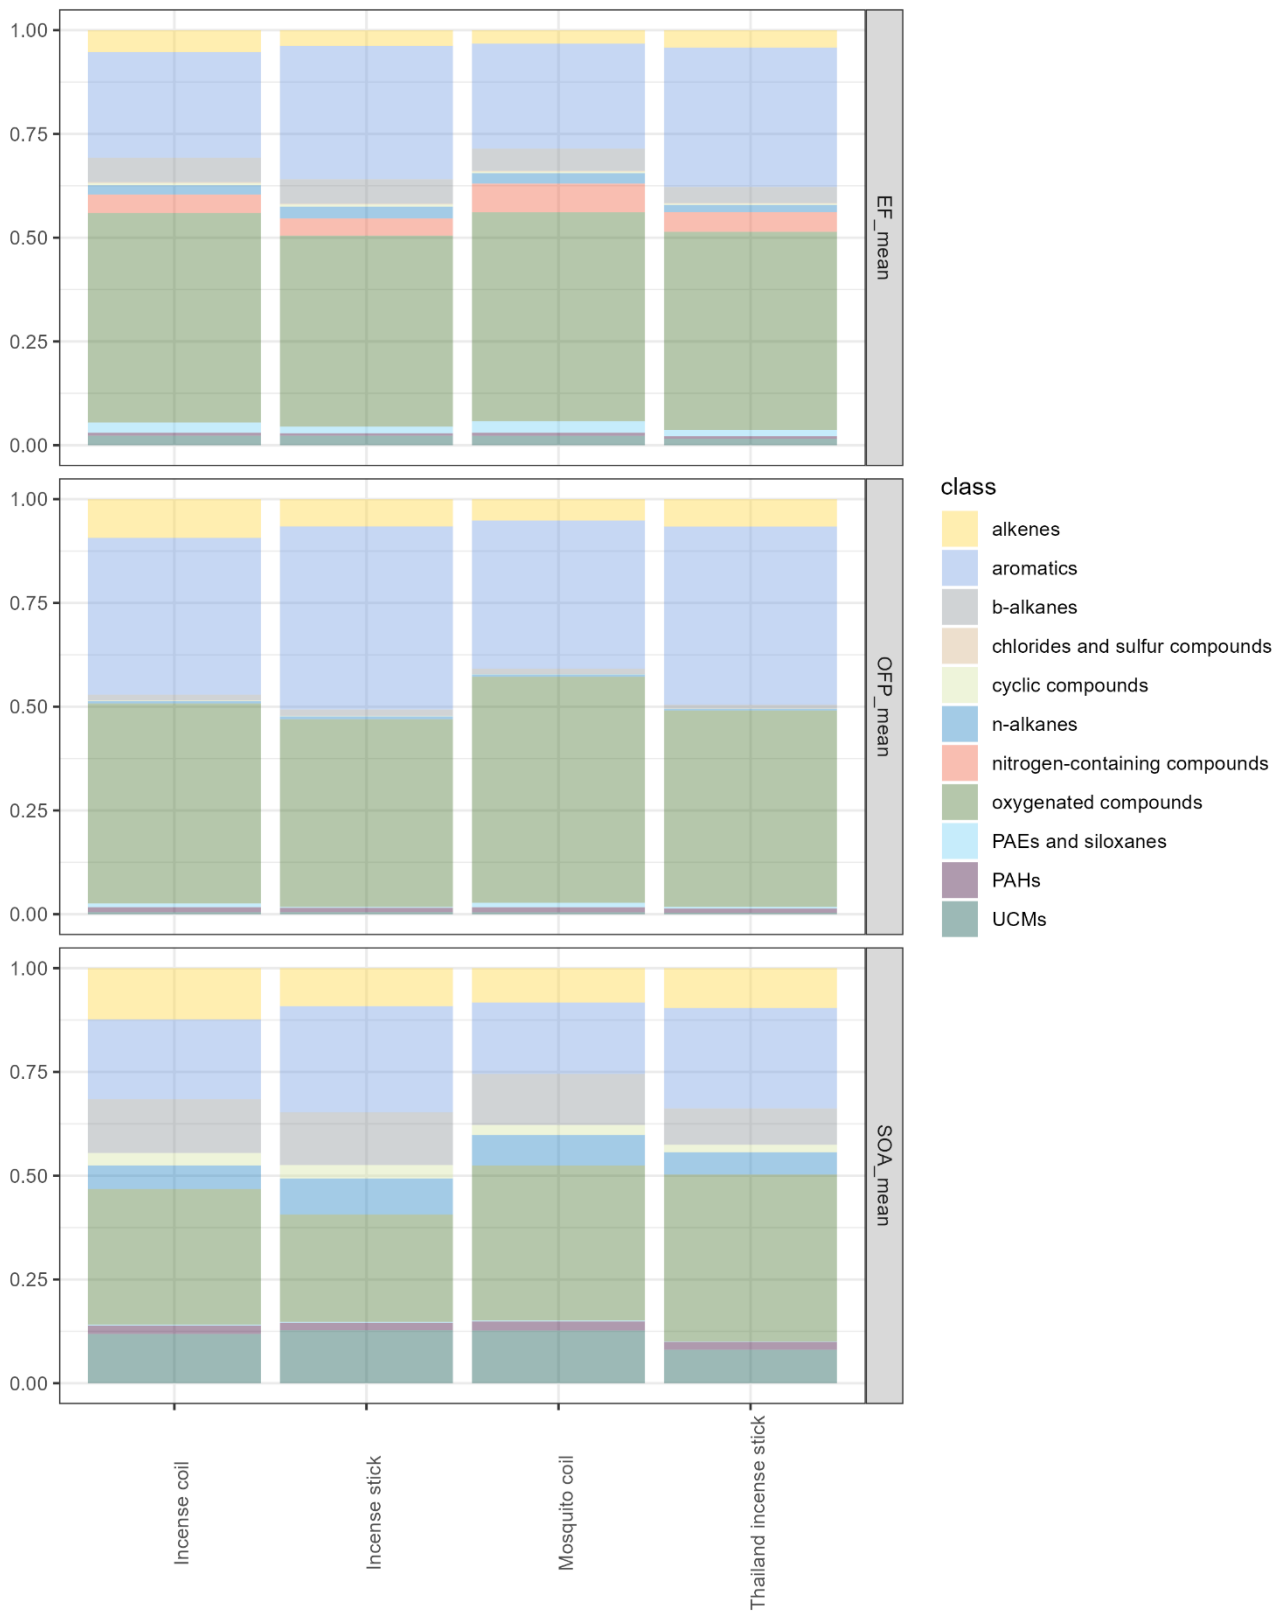

101

102 **Figure S9.** Compositions of EFs, OFP, and SOA estimation of different types of incense: incense coil,

103 incense stick, mosquito coil, and Thailand incense stick.

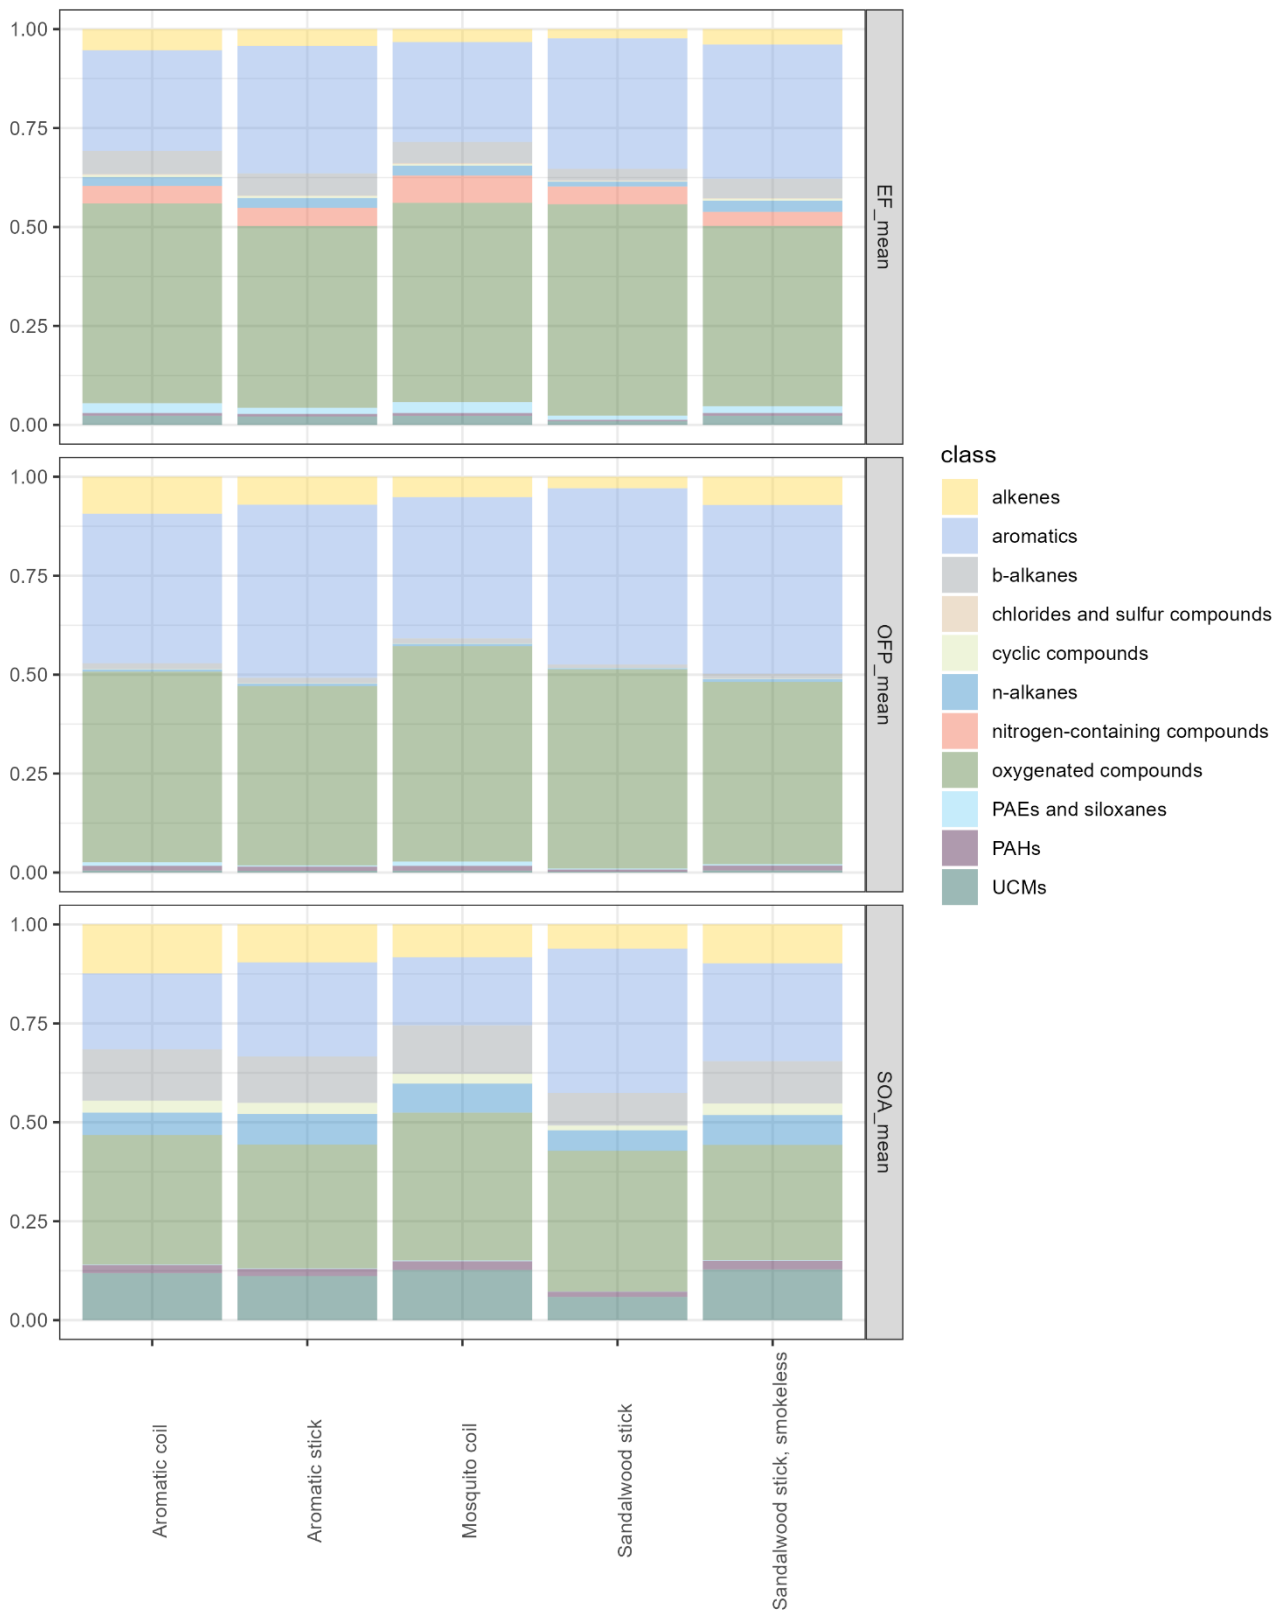

104

105 **Figure S10.** Compositions of EFs, OFP, and SOA estimation of different types of incense: aromatic

106 coil, aromatic stick, mosquito coil, sandalwood stick, and smokeless sandalwood stick.

107

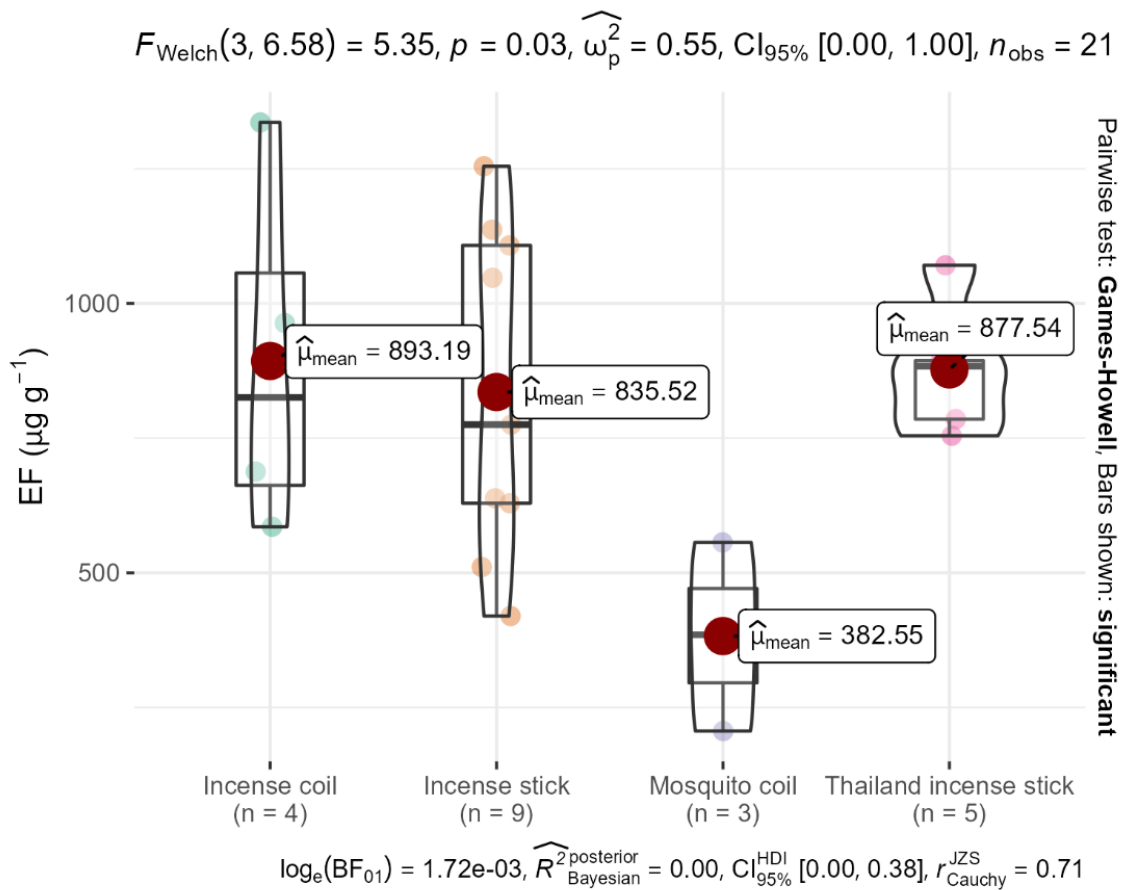

108

109 **Figure S11.** Compositions of EFs of different types of incense: incense coil, incense stick, mosquito

110 coil, and Thailand incense stick.

111



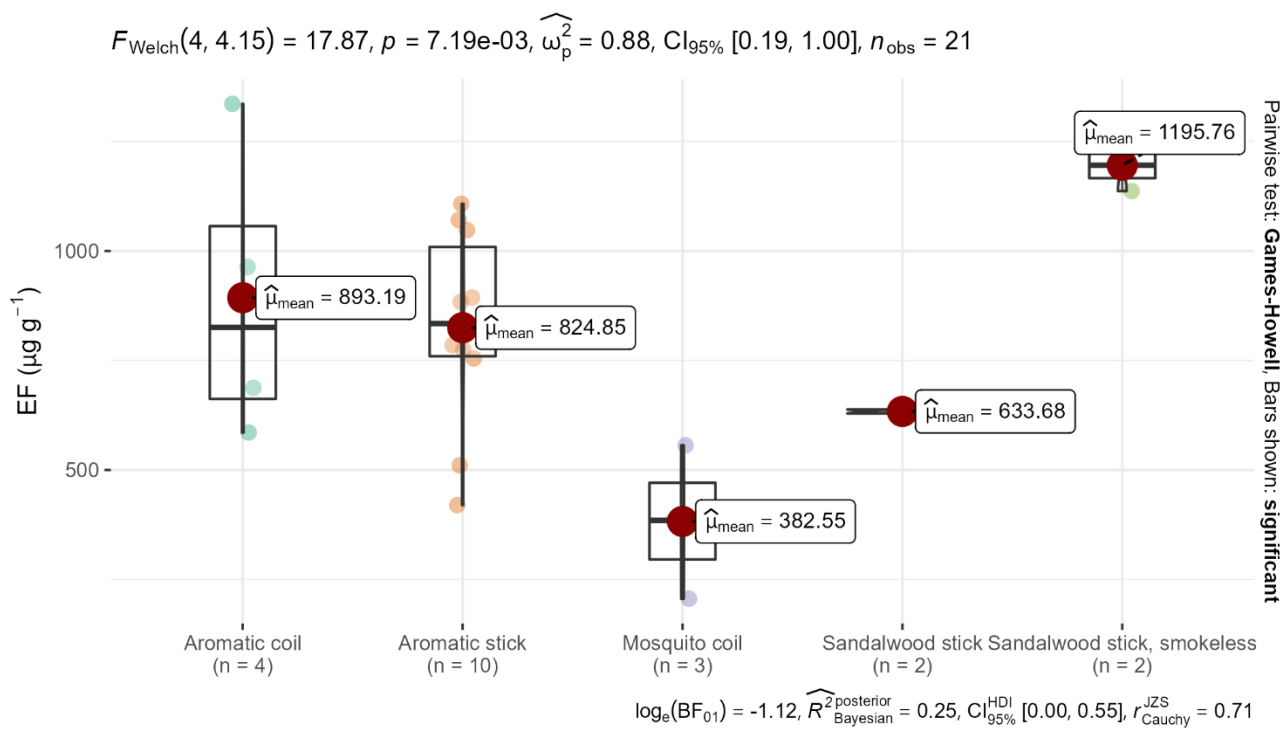

112

113 **Figure S12.** Compositions of EFs of different types of incense: aromatic coil, aromatic stick, mosquito

114 coil, sandalwood stick, and smokeless sandalwood stick.

115

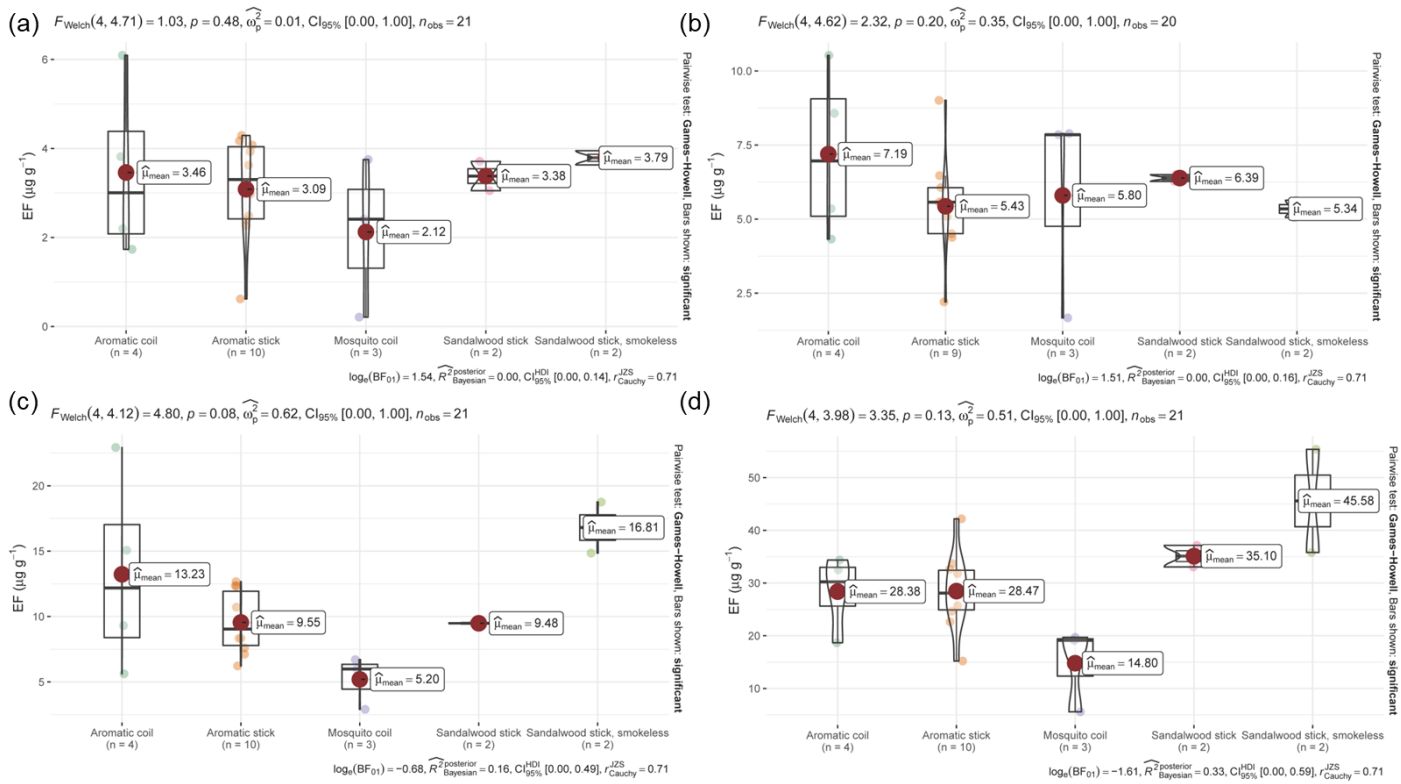

(a) 2-Cyclopenten-1-one, 2-hydroxy-, (b) 2-Furanmethanol, (c) 2-Pentanone, 3-ethyl-, (d) Furfural

116

117 **Figure S13.** Relationships of 2-hydroxy-2-cyclopenten-1-one (a), 2-furanmethanol (b), 3-ethyl-2-  
 118 pentanone (c), furfural (d) emission factors (EFs) among different incense types.

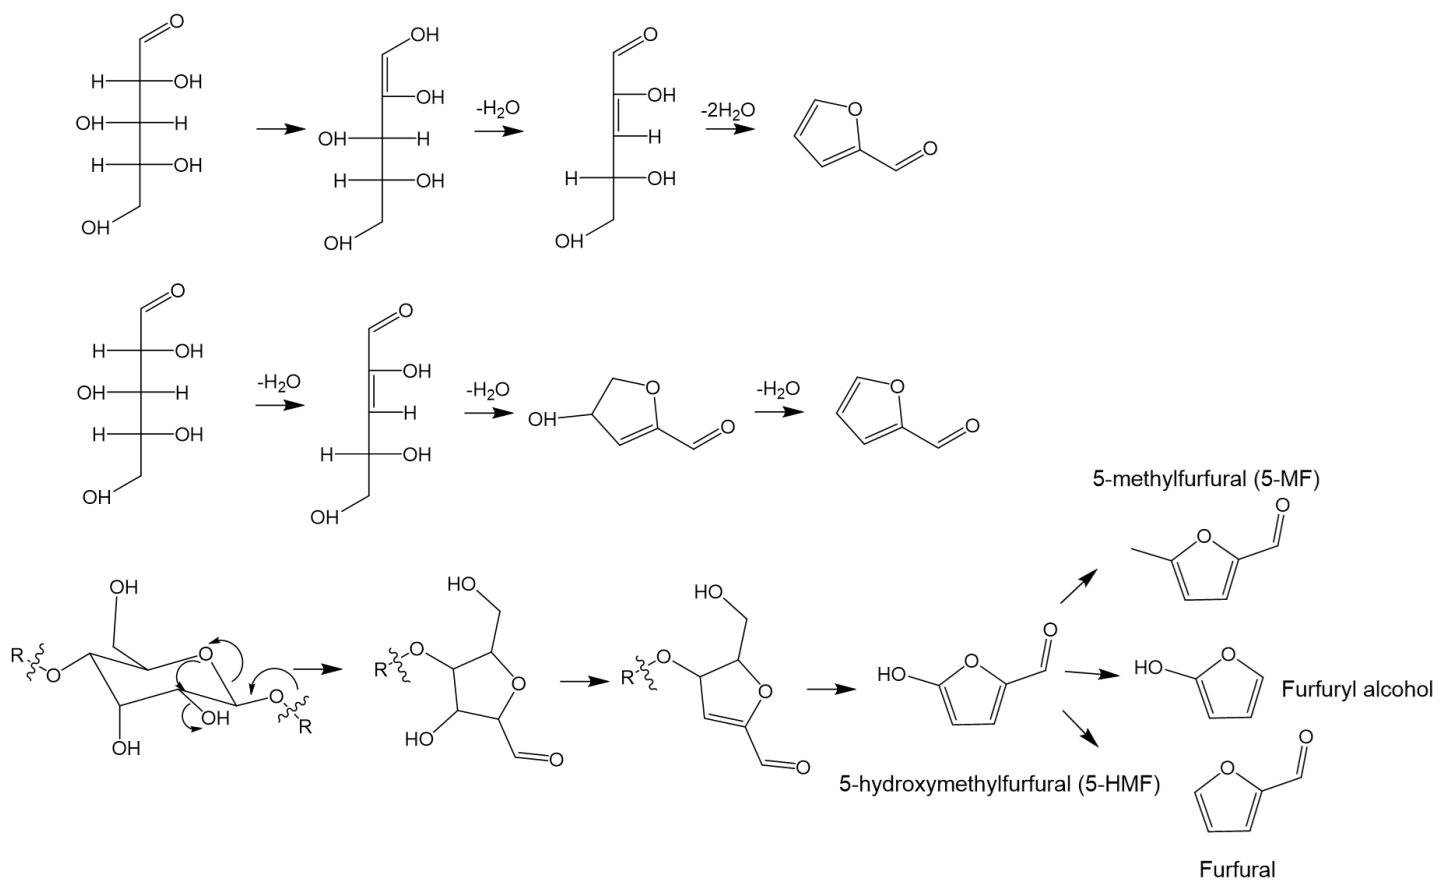

119

120 **Figure S14.** The formation mechanism of furfural from xylose and D-xylopyranose (Ahmad et al.,

121 1995; Bonner and Roth1, 1959; Nimlos et al., 2006).

122

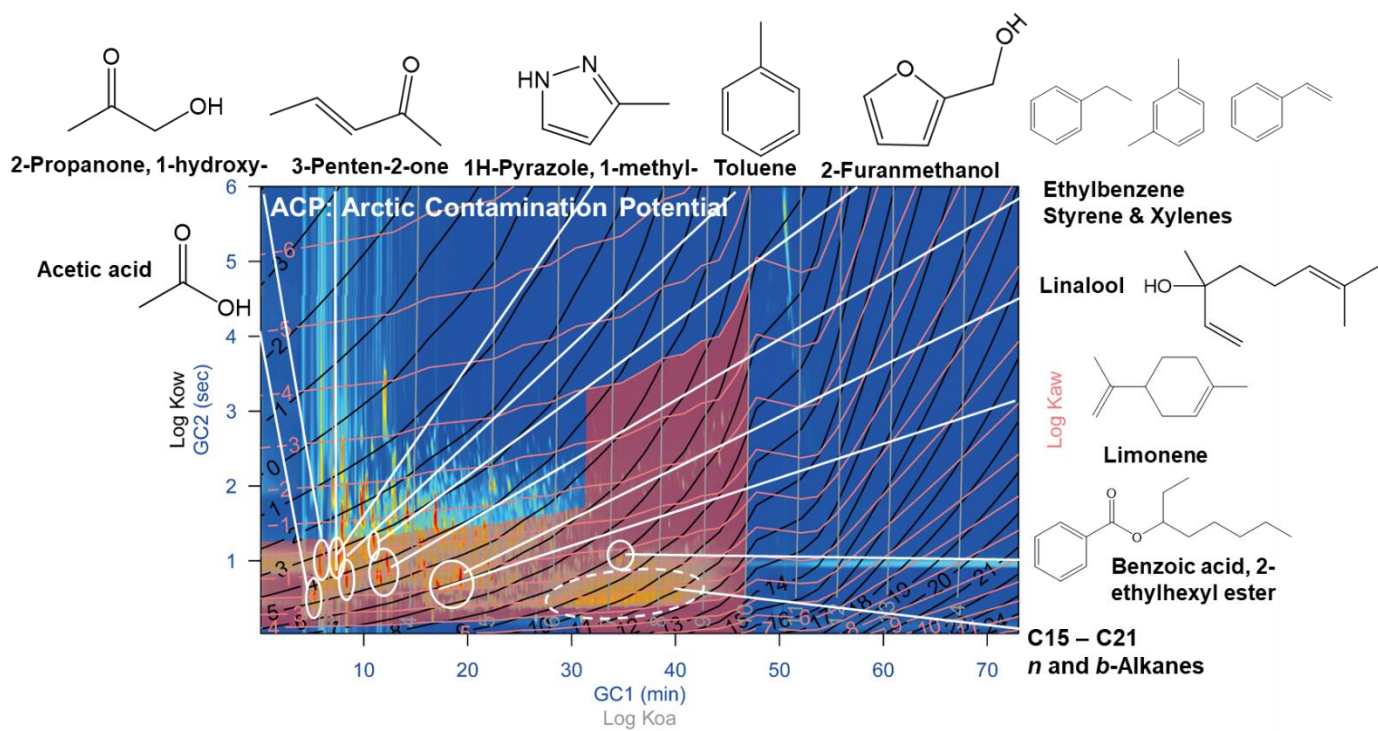

123

124 **Figure S15.** Chemicals with high arctic contamination potential (ACP) assessed by pixel-based  
 125 approaches.

126

127 **References**

- 128 Ahmad, T., Kenne, L., Olsson, K., and Theander, O.: The formation of 2-furaldehyde and formic acid  
129 from pentoses in slightly acidic deuterium oxide studied by <sup>1</sup>H NMR spectroscopy, *Carbohydr Res*,  
130 276, 309–320, [https://doi.org/10.1016/0008-6215\(95\)00176-T](https://doi.org/10.1016/0008-6215(95)00176-T), 1995.
- 131 Algrim, L. B. and Ziemann, P. J.: Effect of the Keto Group on Yields and Composition of Organic  
132 Aerosol Formed from OH Radical-Initiated Reactions of Ketones in the Presence of NO<sub>x</sub>, *Journal of*  
133 *Physical Chemistry A*, 120, 6978–6989, <https://doi.org/10.1021/acs.jpca.6b05839>, 2016.
- 134 Algrim, L. B. and Ziemann, P. J.: Effect of the Hydroxyl Group on Yields and Composition of Organic  
135 Aerosol Formed from OH Radical-Initiated Reactions of Alcohols in the Presence of NO<sub>x</sub>, *ACS Earth*  
136 *Space Chem*, 3, 413–423, <https://doi.org/10.1021/acsearthspacechem.9b00015>, 2019.
- 137 Bonner, W. A. and Roth1, M. R.: The Conversion of d-Xylose-1-C<sup>14</sup> into 2-Furaldehyde- $\alpha$ -C<sup>14</sup>, *J Am*  
138 *Chem Soc*, 81, 5454–5456, <https://doi.org/10.1021/ja01529a051>, 1959.
- 139 Chan, A. W. H., Kautzman, K. E., Chhabra, P. S., Surratt, J. D., Chan, M. N., Crouse, J. D., Kürten,  
140 A., Wennberg, P. O., Flagan, R. C., and Seinfeld, J. H.: Secondary organic aerosol formation from  
141 photooxidation of naphthalene and alkylnaphthalenes: Implications for oxidation of intermediate  
142 volatility organic compounds (IVOCs), *Atmos Chem Phys*, 9, 3049–3060, [https://doi.org/10.5194/acp-](https://doi.org/10.5194/acp-9-3049-2009)  
143 [9-3049-2009](https://doi.org/10.5194/acp-9-3049-2009), 2009.
- 144 Chan, A. W. H., Chan, M. N., Surratt, J. D., Chhabra, P. S., Loza, C. L., Crouse, J. D., Yee, L. D.,  
145 Flagan, R. C., Wennberg, P. O., and Seinfeld, J. H.: Role of aldehyde chemistry and NO<sub>x</sub>  
146 concentrations in secondary organic aerosol formation, *Atmos Chem Phys*, 10, 7169–7188,  
147 <https://doi.org/10.5194/ACP-10-7169-2010>, 2010.
- 148 Charan, S. M., Buenconsejo, R. S., and Seinfeld, J. H.: Secondary organic aerosol yields from the  
149 oxidation of benzyl alcohol, *Atmos Chem Phys*, 20, 13167–13190, [https://doi.org/10.5194/acp-20-](https://doi.org/10.5194/acp-20-13167-2020)  
150 [13167-2020](https://doi.org/10.5194/acp-20-13167-2020), 2020.
- 151 Harvey, R. M. and Petrucci, G. A.: Control of ozonolysis kinetics and aerosol yield by nuances in the  
152 molecular structure of volatile organic compounds, *Atmos Environ*, 122, 188–195,  
153 <https://doi.org/10.1016/j.atmosenv.2015.09.038>, 2015.
- 154 Lee, S. C. and Wang, B.: Characteristics of emissions of air pollutants from burning of incense in a

155 large environmental chamber, *Atmos Environ*, 38, 941–951,  
156 <https://doi.org/10.1016/j.atmosenv.2003.11.002>, 2004.

157 Li, L., Tang, P., Nakao, S., and Cocker, D. R.: Impact of molecular structure on secondary organic  
158 aerosol formation from aromatic hydrocarbon photooxidation under low-NO<sub>x</sub> conditions, *Atmos*  
159 *Chem Phys*, 16, 10793–10808, <https://doi.org/10.5194/acp-16-10793-2016>, 2016.

160 Liu, T., Wang, Z., Huang, D. D., Wang, X., and Chan, C. K.: Significant Production of Secondary  
161 Organic Aerosol from Emissions of Heated Cooking Oils, *Environ Sci Technol Lett*, 5, 32–37,  
162 <https://doi.org/10.1021/acs.estlett.7b00530>, 2018.

163 Loza, C. L., Craven, J. S., Yee, L. D., Coggon, M. M., Schwantes, R. H., Shiraiwa, M., Zhang, X.,  
164 Schilling, K. A., Ng, N. L., Canagaratna, M. R., Ziemann, P. J., Flagan, R. C., and Seinfeld, J. H.:  
165 Secondary organic aerosol yields of 12-carbon alkanes, *Atmos Chem Phys*, 14, 1423–1439,  
166 <https://doi.org/10.5194/acp-14-1423-2014>, 2014.

167 Manoukian, A., Buiron, D., Temime-Roussel, B., Wortham, H., and Quivet, E.: Measurements of  
168 VOC/SVOC emission factors from burning incenses in an environmental test chamber: influence of  
169 temperature, relative humidity, and air exchange rate, *Environmental Science and Pollution Research*,  
170 23, 6300–6311, <https://doi.org/10.1007/s11356-015-5819-2>, 2016.

171 Matsunaga, A., Docherty, K. S., Lim, Y. B., and Ziemann, P. J.: Composition and yields of secondary  
172 organic aerosol formed from OH radical-initiated reactions of linear alkenes in the presence of NO<sub>x</sub>:  
173 Modeling and measurements, *Atmos Environ*, 43, 1349–1357,  
174 <https://doi.org/10.1016/j.atmosenv.2008.12.004>, 2009.

175 McDonald, B. C., De Gouw, J. A., Gilman, J. B., Jathar, S. H., Akherati, A., Cappa, C. D., Jimenez, J.  
176 L., Lee-Taylor, J., Hayes, P. L., McKeen, S. A., Cui, Y. Y., Kim, S. W., Gentner, D. R., Isaacman-  
177 VanWertz, G., Goldstein, A. H., Harley, R. A., Frost, G. J., Roberts, J. M., Ryerson, T. B., and Trainer,  
178 M.: Volatile chemical products emerging as largest petrochemical source of urban organic emissions,  
179 *Science* (1979), 359, 760–764, <https://doi.org/10.1126/science.aaq0524>, 2018.

180 Nimlos, M. R., Qian, X., Davis, M., Himmel, M. E., and Johnson, D. K.: Energetics of xylose  
181 decomposition as determined using quantum mechanics modeling, *Journal of Physical Chemistry A*,  
182 110, 11824–11838, <https://doi.org/10.1021/jp0626770>, 2006.

183 Shah, R. U., Coggon, M. M., Gkatzelis, G. I., McDonald, B. C., Tasoglou, A., Huber, H., Gilman, J.,  
184 Warneke, C., Robinson, A. L., and Presto, A. A.: Urban Oxidation Flow Reactor Measurements Reveal  
185 Significant Secondary Organic Aerosol Contributions from Volatile Emissions of Emerging  
186 Importance, *Environ Sci Technol*, 54, 714–725, <https://doi.org/10.1021/acs.est.9b06531>, 2020.

187 Tkacik, D. S., Presto, A. A., Donahue, N. M., and Robinson, A. L.: Secondary organic aerosol  
188 formation from intermediate-volatility organic compounds: Cyclic, linear, and branched alkanes,  
189 *Environ Sci Technol*, 46, 8773–8781, <https://doi.org/10.1021/es301112c>, 2012.

190 Wu, W., Zhao, B., Wang, S., and Hao, J.: Ozone and secondary organic aerosol formation potential  
191 from anthropogenic volatile organic compounds emissions in China, *J Environ Sci (China)*, 53, 224–  
192 237, <https://doi.org/10.1016/j.jes.2016.03.025>, 2017.

193 Yang, T. T., Lin, T. S., and Chang, M.: Characteristics of emissions of volatile organic compounds  
194 from smoldering incense, *Bull Environ Contam Toxicol*, 78, 308–313, [https://doi.org/10.1007/s00128-  
195 007-9184-9](https://doi.org/10.1007/s00128-007-9184-9), 2007.

196 Zhao, Y., Hennigan, C. J., May, A. A., Tkacik, D. S., De Gouw, J. A., Gilman, J. B., Kuster, W. C.,  
197 Borbon, A., and Robinson, A. L.: Intermediate-volatility organic compounds: A large source of  
198 secondary organic aerosol, *Environ Sci Technol*, 48, 13743–13750, <https://doi.org/10.1021/es5035188>,  
199 2014.

200 Zhao, Y., Saleh, R., Saliba, G., Presto, A. A., Gordon, T. D., Drozd, G. T., Goldstein, A. H., Donahue,  
201 N. M., and Robinson, A. L.: Reducing secondary organic aerosol formation from gasoline vehicle  
202 exhaust, *Proc Natl Acad Sci U S A*, 114, 6984–6989, <https://doi.org/10.1073/pnas.1620911114>, 2017.

203 Zushi, Y., Yamatori, Y., Nagata, J., and Nabi, D.: Comprehensive two-dimensional gas-  
204 chromatography-based property estimation to assess the fate and behavior of complex mixtures: A case  
205 study of vehicle engine oil, *Science of the Total Environment*, 669, 739–745,  
206 <https://doi.org/10.1016/j.scitotenv.2019.03.157>, 2019.

207
